# Supplementary material for: The European guideline on management of major bleeding and coagulopathy following trauma: fourth edition
Source: PubMed Central journal article supplement (PMC4828865; doi:10.1186/s13054-016-1265-x), 2016-04-12
Supplement: 13054_2016_1265_MOESM1_ESM.pdf [file 13054_2016_1265_MOESM1_ESM.pdf]

**The European guideline on management of major bleeding and coagulopathy following trauma:  
Fourth edition**

Rossaint R, Bouillon B, Cerny V, Coats TJ, Duranteau J, Fernández-Mondéjar E, Filipescu D, Hunt BJ, Komadina R, Nardi G, Neugebauer EAM, Ozier Y, Riddez L, Schultz A, Vincent J-L, Spahn DR

- 1 **Additional data file 1.** MeSH terms and limits applied to address guideline literature queries were performed on 30 January 2015; some additional
- 2 and/or newer citations may have been added ad hoc in response to professional society and peer reviewer requests.

3

| Question                                                          | Query                                                                                                                                                                                                                                                                                                                                                                                                                                                                                                                                                                                                                                                                                                                                                                                                                                                           | Limit                                                                                                             |
|-------------------------------------------------------------------|-----------------------------------------------------------------------------------------------------------------------------------------------------------------------------------------------------------------------------------------------------------------------------------------------------------------------------------------------------------------------------------------------------------------------------------------------------------------------------------------------------------------------------------------------------------------------------------------------------------------------------------------------------------------------------------------------------------------------------------------------------------------------------------------------------------------------------------------------------------------|-------------------------------------------------------------------------------------------------------------------|
| <b>I INITIAL RESUSCITATION AND PREVENTION OF FURTHER BLEEDING</b> |                                                                                                                                                                                                                                                                                                                                                                                                                                                                                                                                                                                                                                                                                                                                                                                                                                                                 |                                                                                                                   |
| <b>1</b>                                                          | <b>Does coagulopathy have an effect on outcome in patients with different types of injury?</b>                                                                                                                                                                                                                                                                                                                                                                                                                                                                                                                                                                                                                                                                                                                                                                  |                                                                                                                   |
|                                                                   | "Wounds and Injuries"[MeSH] AND "Blood coagulation disorders"[MeSH]                                                                                                                                                                                                                                                                                                                                                                                                                                                                                                                                                                                                                                                                                                                                                                                             | Clinical Trial, Meta-Analysis, Practice Guideline, Randomized Controlled Trial, Review, Humans, English, 2012-end |
| <b>2</b>                                                          | <b>Does control of acid-base balance during the initial resuscitation affect outcome?</b>                                                                                                                                                                                                                                                                                                                                                                                                                                                                                                                                                                                                                                                                                                                                                                       |                                                                                                                   |
|                                                                   | "Wounds and Injuries"[MAJR] AND "Acid-Base Equilibrium"[MeSH]                                                                                                                                                                                                                                                                                                                                                                                                                                                                                                                                                                                                                                                                                                                                                                                                   | Humans<br>English<br>2012-end                                                                                     |
| <b>3</b>                                                          | <b>Does the degree of initial bleeding affect coagulopathy?</b>                                                                                                                                                                                                                                                                                                                                                                                                                                                                                                                                                                                                                                                                                                                                                                                                 |                                                                                                                   |
| <b>4</b>                                                          | <b>Does the degree of initial bleeding affect outcome?</b>                                                                                                                                                                                                                                                                                                                                                                                                                                                                                                                                                                                                                                                                                                                                                                                                      |                                                                                                                   |
|                                                                   | "Wounds and Injuries"[MeSH] AND "Hemorrhage"[MeSH] AND "Hemostasis"[MeSH]                                                                                                                                                                                                                                                                                                                                                                                                                                                                                                                                                                                                                                                                                                                                                                                       | Humans<br>English<br>2012-end                                                                                     |
| <b>5</b>                                                          | <b>Does initial resuscitation with respect to haemostasis have an effect on outcome in patients with different types of injury?</b>                                                                                                                                                                                                                                                                                                                                                                                                                                                                                                                                                                                                                                                                                                                             |                                                                                                                   |
|                                                                   | ("Wounds and Injuries"[MeSH] OR "injuries"[Subheading] OR "Craniocerebral Trauma"[MeSH] OR "Trauma Severity Indices"[MeSH] OR "Trauma Centers"[MeSH] OR "Cumulative Trauma Disorders"[MeSH] OR "Cerebrovascular Trauma"[MeSH] OR "Multiple Trauma"[MeSH] OR "Trauma, Nervous System"[MeSH] OR "Head Injuries, Penetrating"[MeSH] OR "Abducens Nerve Injury"[MeSH] OR "Optic Nerve Injuries"[MeSH] OR "Coma, Post-Head Injury"[MeSH] OR "Facial Nerve Injuries"[MeSH] OR "Carotid Artery Injuries"[MeSH] OR "Head Injuries, Closed"[MeSH] OR "Spinal Cord Injuries"[MeSH] OR "Traumatology"[MeSH] OR "Brain Injuries"[MeSH] OR "Emergency Treatment"[MeSH] OR "Emergencies"[MeSH] OR "Critical Care"[MeSH] OR "Emergency Treatment"[MeSH]) AND ("Resuscitation"[MeSH] OR "Resuscitation Orders"[MeSH]) AND ("Hemostatic Techniques"[MeSH] OR "Hemostasis"[MeSH]) | Humans<br>English<br>2012-end                                                                                     |
| <b>6</b>                                                          | <b>Is wound compression effective in preventing bleeding and coagulopathy?</b>                                                                                                                                                                                                                                                                                                                                                                                                                                                                                                                                                                                                                                                                                                                                                                                  |                                                                                                                   |

**The European guideline on management of major bleeding and coagulopathy following trauma:  
Fourth edition**

Rossaint R, Bouillon B, Cerny V, Coats TJ, Duranteau J, Fernández-Mondéjar E, Filipescu D, Hunt BJ, Komadina R, Nardi G, Neugebauer EAM, Ozier Y, Riddez L, Schultz A, Vincent J-L, Spahn DR

|           |                                                                                                                                                                                                                                                                                                                                                                                                                                                                                                                                                                                                                                                                                                                                                                                                                                                                                                               |                               |
|-----------|---------------------------------------------------------------------------------------------------------------------------------------------------------------------------------------------------------------------------------------------------------------------------------------------------------------------------------------------------------------------------------------------------------------------------------------------------------------------------------------------------------------------------------------------------------------------------------------------------------------------------------------------------------------------------------------------------------------------------------------------------------------------------------------------------------------------------------------------------------------------------------------------------------------|-------------------------------|
| a         | ("Wounds and Injuries"[MeSH] OR "injuries"[Subheading] OR "Craniocerebral Trauma"[MeSH] OR "Trauma Severity Indices"[MeSH] OR "Trauma Centers"[MeSH] OR "Cumulative Trauma Disorders"[MeSH] OR "Cerebrovascular Trauma"[MeSH] OR "Multiple Trauma"[MeSH] OR "Trauma, Nervous System"[MeSH] OR "Head Injuries, Penetrating"[MeSH] OR "Abducens Nerve Injury"[MeSH] OR "Optic Nerve Injuries"[MeSH] OR "Coma, Post-Head Injury"[MeSH] OR "Facial Nerve Injuries"[MeSH] OR "Carotid Artery Injuries"[MeSH] OR "Head Injuries, Closed"[MeSH] OR "Spinal Cord Injuries"[MeSH] OR "Traumatology"[MeSH] OR "Brain Injuries"[MeSH] OR "Emergency Treatment"[MeSH] OR "Emergencies"[MeSH] OR "Critical Care"[MeSH] OR "Emergency Treatment"[MeSH]) AND ("Resuscitation"[MeSH] OR "Resuscitation Orders"[MeSH]) AND ("Hemostatic Techniques"[MeSH] OR "Hemostasis"[MeSH]) AND ("Bandages"[MeSH] OR "Tourniquets"[Mesh]) | Humans<br>English<br>2012-end |
| b         | ("Hemostatic Techniques"[MeSH] OR "Hemostasis"[MeSH]) AND ("Bandages"[MeSH] OR "Tourniquets"[Mesh])                                                                                                                                                                                                                                                                                                                                                                                                                                                                                                                                                                                                                                                                                                                                                                                                           | Humans<br>English<br>2012-end |
| c         | "Tourniquets"[Mesh]                                                                                                                                                                                                                                                                                                                                                                                                                                                                                                                                                                                                                                                                                                                                                                                                                                                                                           | Humans<br>English<br>2012-end |
| <b>7</b>  | <b>Does the duration of the pre-hospital phase of initial resuscitation have an effect on outcome in patients with haemorrhagic shock?</b>                                                                                                                                                                                                                                                                                                                                                                                                                                                                                                                                                                                                                                                                                                                                                                    |                               |
|           | "Shock, Hemorrhagic"[MeSH] AND ("Emergency Medical Services"[MeSH] OR "Emergencies"[MeSH] OR "Ambulances"[MeSH] OR "Emergency Medical Technicians"[MeSH] OR "Emergency Treatment"[MeSH] OR "Emergency Medical Tags"[MeSH] OR "Emergency Nursing"[MeSH] OR "Emergency Medicine"[MeSH] OR "Emergency Medical Service Communication Systems"[MeSH] OR "Air Ambulances"[MeSH]) AND (pre-hospital OR prehospital)                                                                                                                                                                                                                                                                                                                                                                                                                                                                                                  | Humans<br>English<br>2012-end |
| <b>8</b>  | <b>Does the amount of bleeding and type of injury influence the selection of the hospital to which the trauma patient should be transported?</b>                                                                                                                                                                                                                                                                                                                                                                                                                                                                                                                                                                                                                                                                                                                                                              |                               |
|           | "Health Care Category"[MAJR] AND "Hemorrhage"[MeSH] AND "Wounds and Injuries"[MeSH] AND ("Emergencies"[MeSH] OR "Emergency Treatment"[MeSH] OR "Emergency Medicine"[MeSH] OR "Emergency Medical Technicians"[MeSH])                                                                                                                                                                                                                                                                                                                                                                                                                                                                                                                                                                                                                                                                                           | Humans<br>English<br>2012-end |
| <b>9</b>  | <b>Does the gender of the bleeding trauma patient affect outcome?</b>                                                                                                                                                                                                                                                                                                                                                                                                                                                                                                                                                                                                                                                                                                                                                                                                                                         |                               |
| <b>10</b> | <b>Does the age of the bleeding trauma patient affect outcome?</b>                                                                                                                                                                                                                                                                                                                                                                                                                                                                                                                                                                                                                                                                                                                                                                                                                                            |                               |
| a         | "Wounds and Injuries"[MeSH] AND "Hemorrhage"[MeSH] AND "Hemostasis"[MeSH] AND ("sex"[MeSH Terms] OR "Age Factors"[Mesh])                                                                                                                                                                                                                                                                                                                                                                                                                                                                                                                                                                                                                                                                                                                                                                                      | Humans<br>English             |
| b         | "Wounds and Injuries"[MeSH] AND "Blood coagulation disorders"[MeSH] AND ("sex"[MeSH Terms] OR "Female"[Mesh] OR "Male"[Mesh] OR "Age Factors"[MeSH] OR "Aged"[MeSH] OR "Geriatrics"[Mesh])                                                                                                                                                                                                                                                                                                                                                                                                                                                                                                                                                                                                                                                                                                                    | Humans<br>English<br>2012-end |
| <b>11</b> | <b>Is there a specific coagulation disorder associated with traumatic injury?</b>                                                                                                                                                                                                                                                                                                                                                                                                                                                                                                                                                                                                                                                                                                                                                                                                                             |                               |
|           | "Wounds and Injuries"[MeSH] AND "Hemorrhage"[MeSH] AND "Hemostasis"[MeSH] AND "Blood Coagulation Disorders"[Mesh]                                                                                                                                                                                                                                                                                                                                                                                                                                                                                                                                                                                                                                                                                                                                                                                             | Humans<br>English             |
| <b>12</b> | <b>Should ventilation strategy be targeted to maximize oxygenation?</b>                                                                                                                                                                                                                                                                                                                                                                                                                                                                                                                                                                                                                                                                                                                                                                                                                                       |                               |
|           | ("Craniocerebral Trauma"[MeSH] OR "Cerebrovascular Trauma"[MeSH] OR "Multiple Trauma"[MeSH] OR "Trauma, Nervous System"[MeSH] OR "Head Injuries, Penetrating"[MeSH] OR "Carotid Artery Injuries"[MeSH] OR "Head Injuries, Closed"[MeSH] OR "Spinal Cord Injuries"[MeSH] OR "Traumatology"[MeSH] OR "Brain Injuries"[MeSH]) AND ("Extracorporeal Membrane Oxygenation"[Mesh] OR "Respiration, Artificial"[Mesh] OR "Positive-Pressure Respiration"[Mesh] OR "Pulmonary Ventilation"[Mesh] OR "Intermittent Positive-Pressure Ventilation"[Mesh] OR "Continuous Positive Airway Pressure"[Mesh])                                                                                                                                                                                                                                                                                                                | Humans<br>English<br>2012-end |
| <b>13</b> | <b>Is tracheal intubation required in all patients?</b>                                                                                                                                                                                                                                                                                                                                                                                                                                                                                                                                                                                                                                                                                                                                                                                                                                                       |                               |
| <b>14</b> | <b>Is there a rationale to support a delay in tracheal intubation?</b>                                                                                                                                                                                                                                                                                                                                                                                                                                                                                                                                                                                                                                                                                                                                                                                                                                        |                               |

**The European guideline on management of major bleeding and coagulopathy following trauma:  
Fourth edition**

Rossaint R, Bouillon B, Cerny V, Coats TJ, Duranteau J, Fernández-Mondéjar E, Filipescu D, Hunt BJ, Komadina R, Nardi G, Neugebauer EAM, Ozier Y, Riddez L, Schultz A, Vincent J-L, Spahn DR

|                                                |   |                                                                                                                                                                                                                                                                                                                                                                                                                                                                                                                                                                                                                                                    |                                    |
|------------------------------------------------|---|----------------------------------------------------------------------------------------------------------------------------------------------------------------------------------------------------------------------------------------------------------------------------------------------------------------------------------------------------------------------------------------------------------------------------------------------------------------------------------------------------------------------------------------------------------------------------------------------------------------------------------------------------|------------------------------------|
|                                                |   | ("Emergencies"[MeSH] OR "Emergency Treatment"[MeSH] OR "Emergency Medicine"[MeSH] OR "Emergency Medical Technicians"[MeSH] OR "Wounds and Injuries"[MeSH] OR "Craniocerebral Trauma"[MeSH] OR "Cerebrovascular Trauma"[MeSH] OR "Multiple Trauma"[MeSH] OR "Trauma, Nervous System"[MeSH] OR "Head Injuries, Penetrating"[MeSH] OR "Carotid Artery Injuries"[MeSH] OR "Head Injuries, Closed"[MeSH] OR "Spinal Cord Injuries"[MeSH] OR "Traumatology"[MeSH] OR "Brain Injuries"[MeSH]) AND "Intubation, Intratracheal"[Mesh] AND ("timing"[All Fields] OR "early"[All Fields] OR "late"[All Fields] OR "delay"[All Fields] OR "defer"[All Fields]) | Humans, English, 2012-end/         |
| 15                                             |   | <b>Does the type of injury influence the selection of the hospital?</b>                                                                                                                                                                                                                                                                                                                                                                                                                                                                                                                                                                            |                                    |
|                                                |   | ("Trauma Severity Indices"[Mesh]) AND "Trauma Centers"[Mesh] AND "Wounds and Injuries"[Mesh] OR "Regional Medical Programs"[Mesh])                                                                                                                                                                                                                                                                                                                                                                                                                                                                                                                 | Humans, English, Systematic Review |
| <b>II DIAGNOSIS AND MONITORING OF BLEEDING</b> |   |                                                                                                                                                                                                                                                                                                                                                                                                                                                                                                                                                                                                                                                    |                                    |
| 1                                              |   | <b>Is there evidence to support a correlation between the mechanism of injury and the risk of bleeding?</b>                                                                                                                                                                                                                                                                                                                                                                                                                                                                                                                                        |                                    |
|                                                |   | "Wounds and Injuries"[MAJR] AND "Hemorrhage"[MeSH] AND correlation[All Fields]                                                                                                                                                                                                                                                                                                                                                                                                                                                                                                                                                                     | Humans English 2012-end            |
| 2                                              |   | <b>Which clinical signs are most appropriate to detect the patient who is actively bleeding?</b>                                                                                                                                                                                                                                                                                                                                                                                                                                                                                                                                                   |                                    |
|                                                |   | "Wounds and Injuries"[MeSH] AND "Hemorrhage"[MeSH] AND ("Emergencies"[MeSH] OR "Emergency Treatment"[MeSH] OR "Emergency Medicine"[MeSH] OR "Emergency Medical Technicians"[MeSH]) AND ("Diagnosis"[MeSH] OR "Signs and Symptoms"[MeSH])                                                                                                                                                                                                                                                                                                                                                                                                           | Humans English 2012-end            |
| 3                                              |   | <b>Which laboratory parameters (biochemical tests) are most appropriate to detect the patient who is actively bleeding?</b>                                                                                                                                                                                                                                                                                                                                                                                                                                                                                                                        |                                    |
|                                                |   | "Wounds and Injuries" [MeSH] AND "Hemorrhage" [MeSH] AND ("Clinical Chemistry Tests"[MeSH] OR "Monitoring, Physiologic" [MeSH] OR "Chemistry, Clinical"[MeSH] OR "Biological Markers"[MeSH] OR "Intercellular Signaling Peptides and Proteins"[MeSH])                                                                                                                                                                                                                                                                                                                                                                                              | Humans English 2012-end            |
| 4                                              |   | <b>Which imaging diagnostic tools are most appropriate to detect the patient who is actively bleeding?</b>                                                                                                                                                                                                                                                                                                                                                                                                                                                                                                                                         |                                    |
|                                                |   | "Wounds and injuries"[MeSH] AND "Hemorrhage"[MeSH] AND "Diagnostic Imaging"[MeSH] AND ("Emergencies"[MeSH] OR "Emergency Treatment"[MeSH] OR "Emergency Medicine"[MeSH] OR "Emergency Medical Technicians"[MeSH])                                                                                                                                                                                                                                                                                                                                                                                                                                  | Humans English 2012-end            |
| 5                                              |   | <b>Is there evidence to support the use of a specific score to assess the extent of bleeding?</b>                                                                                                                                                                                                                                                                                                                                                                                                                                                                                                                                                  |                                    |
| 6                                              |   | <b>Is the ATLS shock classification still a valid classification system?</b>                                                                                                                                                                                                                                                                                                                                                                                                                                                                                                                                                                       |                                    |
|                                                |   | "Hemorrhage"[MeSH] AND "Trauma Severity Indices"[MeSH] AND "Wounds and Injuries"[MeSH]                                                                                                                                                                                                                                                                                                                                                                                                                                                                                                                                                             | Humans English 2012-end            |
| 7                                              |   | <b>Which coagulation monitoring tools are most appropriate to detect the patient who is actively bleeding?</b>                                                                                                                                                                                                                                                                                                                                                                                                                                                                                                                                     |                                    |
|                                                | a | ("Wounds and Injuries/diagnosis"[MAJR] OR "Hemorrhage/diagnosis"[MAJR] OR "Blood Coagulation Disorders/diagnosis"[MAJR] OR "Blood Coagulation Factors/analysis"[MAJR] OR "Blood Coagulation Factors/diagnostic use"[MAJR]) AND ("Point-of-Care Systems"[Mesh] OR "Thrombelastography"[Mesh])                                                                                                                                                                                                                                                                                                                                                       | Humans English 2012-end            |

**The European guideline on management of major bleeding and coagulopathy following trauma:  
Fourth edition**

Rossaint R, Bouillon B, Cerny V, Coats TJ, Duranteau J, Fernández-Mondéjar E, Filipescu D, Hunt BJ, Komadina R, Nardi G, Neugebauer EAM, Ozier Y, Riddez L, Schultz A, Vincent J-L, Spahn DR

|            |                                                                                                                          |                                                                                                                                                                                                                                                                                                                                                                                                                                                                                                                                                                       |                               |
|------------|--------------------------------------------------------------------------------------------------------------------------|-----------------------------------------------------------------------------------------------------------------------------------------------------------------------------------------------------------------------------------------------------------------------------------------------------------------------------------------------------------------------------------------------------------------------------------------------------------------------------------------------------------------------------------------------------------------------|-------------------------------|
|            | b                                                                                                                        | ("Wounds and Injuries/diagnosis"[MAJR] AND "Hemorrhage/diagnosis"[MAJR]) AND ("Tomography, X-Ray"[Mesh] OR "Tomography, X-Ray Computed"[Mesh] OR "Multidetector Computed Tomography"[Mesh] OR "Ultrasonography"[Mesh] OR "Peritoneal Lavage"[Mesh])                                                                                                                                                                                                                                                                                                                   | Humans<br>English<br>2012-end |
| <b>8</b>   | <b>Which coagulation monitoring tools are most appropriate to detect post-traumatic coagulopathy?</b>                    |                                                                                                                                                                                                                                                                                                                                                                                                                                                                                                                                                                       |                               |
|            |                                                                                                                          | "Wounds and Injuries"[MeSH] AND ("Hemorrhage"[Mesh] OR "Disseminated Intravascular Coagulation"[Mesh]) AND ("Emergencies"[MeSH] OR "Emergency Treatment"[MeSH] OR "Emergency Medicine"[MeSH] OR "Emergency Medical Technicians"[MeSH]) AND ("Diagnosis"[MeSH] OR "Monitoring, Physiologic"[MeSH] OR "Point-of-Care Systems"[Mesh] OR "Thrombelastography"[Mesh] OR "Predictive Value of Tests"[Mesh])                                                                                                                                                                 | Humans<br>English<br>2012-end |
| <b>9</b>   | <b>Does the type of monitoring tool used have an impact on outcome?</b>                                                  |                                                                                                                                                                                                                                                                                                                                                                                                                                                                                                                                                                       |                               |
|            |                                                                                                                          | "Wounds and Injuries"[MeSH] AND ("Hemorrhage"[Mesh] OR "Disseminated Intravascular Coagulation"[Mesh]) AND ("Emergencies"[MeSH] OR "Emergency Treatment"[MeSH] OR "Emergency Medicine"[MeSH] OR "Emergency Medical Technicians"[MeSH]) AND "Outcome Assessment (Health Care)"[Mesh] AND ("Pathological Conditions, Signs and Symptoms"[Mesh] OR "Diagnosis"[MeSH] OR "Point-of-Care Systems"[Mesh] OR "Thrombelastography"[Mesh] OR "Predictive Value of Tests"[Mesh])                                                                                                | Humans<br>English<br>2012-end |
| <b>10</b>  | <b>Using which coagulation monitoring tools can the effectiveness of therapeutic measures be monitored?</b>              |                                                                                                                                                                                                                                                                                                                                                                                                                                                                                                                                                                       |                               |
| <b>11</b>  | <b>Is there any advantage to thrombelastometry performed at the bedside?</b>                                             |                                                                                                                                                                                                                                                                                                                                                                                                                                                                                                                                                                       |                               |
| <b>12</b>  | <b>Is there any advantage to thrombelastometry performed in the central laboratory?</b>                                  |                                                                                                                                                                                                                                                                                                                                                                                                                                                                                                                                                                       |                               |
|            |                                                                                                                          | "Wounds and Injuries"[MeSH] AND ("Blood Coagulation"[Mesh] AND "Blood Coagulation Disorders"[Mesh]) OR "Hemorrhage "[MeSH] OR "Shock, Hemorrhagic"[MeSH]) AND "Treatment Outcome"[Mesh] AND "Therapeutics"[Mesh] AND ("Emergencies"[MeSH] OR "Emergency Treatment"[MeSH] OR "Emergency Medicine"[MeSH] OR "Emergency Medical Technicians"[MeSH]) AND ("Diagnosis"[MeSH] OR "Monitoring, Physiologic" [MeSH] OR "Point-of-Care Systems"[Mesh] OR "Thrombelastography"[Mesh])                                                                                           | Humans<br>English<br>2012-end |
| <b>13</b>  | <b>Do early detection or diagnostic assessment of coagulation status influence outcome?</b>                              |                                                                                                                                                                                                                                                                                                                                                                                                                                                                                                                                                                       |                               |
|            |                                                                                                                          | "Wounds and Injuries"[MeSH] AND ("Hemorrhage"[Mesh] OR "Disseminated Intravascular Coagulation"[Mesh]) AND ("Emergencies"[MeSH] OR "Emergency Treatment"[MeSH] OR "Emergency Medicine"[MeSH] OR "Emergency Medical Technicians"[MeSH]) AND ("Diagnosis"[MeSH] OR "Monitoring, Physiologic"[MeSH] OR "Point-of-Care Systems"[Mesh] OR "Thrombelastography"[Mesh]) AND ("Early Medical Intervention"[Mesh] OR "Early Diagnosis"[Mesh])                                                                                                                                  | Humans<br>English             |
| <b>14</b>  | <b>Which type of intervention should patients with abdominal and/or thoracic bleeding receive?</b>                       |                                                                                                                                                                                                                                                                                                                                                                                                                                                                                                                                                                       |                               |
|            |                                                                                                                          | ("Wounds and Injuries"[MeSH] OR "Emergencies"[MeSH] OR "Emergency Treatment"[MeSH] OR "Emergency Medicine"[MeSH] OR "Emergency Medical Technicians"[MeSH]) AND ("Hemorrhage"[Mesh] OR "Disseminated Intravascular Coagulation"[Mesh]) AND ("Thorax"[Mesh] OR "Abdomen"[Mesh] OR "Abdominal Cavity"[Mesh])                                                                                                                                                                                                                                                             | Humans<br>English<br>2012-end |
| <b>15</b>  | <b>Does the use of 'hybrid' shock/resuscitation/operating theatre facilities improve outcome in polytrauma patients?</b> |                                                                                                                                                                                                                                                                                                                                                                                                                                                                                                                                                                       |                               |
|            |                                                                                                                          | ("Emergencies"[MeSH] OR "Emergency Treatment"[MeSH] OR "Emergency Medicine"[MeSH] OR "Emergency Medical Technicians"[MeSH] OR "Wounds and Injuries"[MeSH] OR "Craniocerebral Trauma"[MeSH] OR "Cerebrovascular Trauma"[MeSH] OR "Multiple Trauma"[MeSH] OR "Trauma, Nervous System"[MeSH] OR "Head Injuries, Penetrating"[MeSH] OR "Carotid Artery Injuries"[MeSH] OR "Head Injuries, Closed"[MeSH] OR "Spinal Cord Injuries"[MeSH] OR "Traumatology"[MeSH] OR "Brain Injuries"[MeSH]) AND ("Health Facility Size"[Mesh] OR "Facility Design and Construction"[Mesh]) | Humans<br>English<br>2012-end |
| <b>III</b> | <b>TISSUE OXYGENATION, TYPE OF FLUID AND TEMPERATURE MANAGEMENT</b>                                                      |                                                                                                                                                                                                                                                                                                                                                                                                                                                                                                                                                                       |                               |
| <b>1</b>   | <b>What is the corridor for the haematocrit to be achieved for adequate tissue oxygenation?</b>                          |                                                                                                                                                                                                                                                                                                                                                                                                                                                                                                                                                                       |                               |

**The European guideline on management of major bleeding and coagulopathy following trauma:  
Fourth edition**

Rossaint R, Bouillon B, Cerny V, Coats TJ, Duranteau J, Fernández-Mondéjar E, Filipescu D, Hunt BJ, Komadina R, Nardi G, Neugebauer EAM, Ozier Y, Riddez L, Schultz A, Vincent J-L, Spahn DR

|          |                                                                                                                                                                                                                                                                                                                                                                                                                                                                                                                                                                                                                                                                                                                                                                                                                                                                                  |                               |
|----------|----------------------------------------------------------------------------------------------------------------------------------------------------------------------------------------------------------------------------------------------------------------------------------------------------------------------------------------------------------------------------------------------------------------------------------------------------------------------------------------------------------------------------------------------------------------------------------------------------------------------------------------------------------------------------------------------------------------------------------------------------------------------------------------------------------------------------------------------------------------------------------|-------------------------------|
|          | "Hematocrit"[MeSH] AND ("Oxygen Consumption"[MeSH] OR "Blood Gas Monitoring, Transcutaneous"[MeSH] OR "Blood Gas Analysis"[MeSH] OR "Gases"[MeSH] OR "Cell Respiration"[MeSH] OR "Blood Substitutes"[MeSH] OR "Blood Chemical Analysis"[MeSH] OR "Respiratory Function Tests"[MeSH] OR "Oximetry"[MeSH] OR "Blood Pressure"[MeSH] OR "Venous Pressure"[MeSH] OR "Hypotension"[MeSH]) AND ("Emergencies"[MeSH] OR "Emergency Treatment"[MeSH] OR "Emergency Medicine"[MeSH] OR "Emergency Medical Technicians"[MeSH] OR "Wounds and Injuries"[MeSH] OR "Cranio-cerebral Trauma"[MeSH] OR "Cerebrovascular Trauma"[MeSH] OR "Multiple Trauma"[MeSH] OR "Trauma, Nervous System"[MeSH] OR "Head Injuries, Penetrating"[MeSH] OR "Carotid Artery Injuries"[MeSH] OR "Head Injuries, Closed"[MeSH] OR "Spinal Cord Injuries"[MeSH] OR "Traumatology"[MeSH] OR "Brain Injuries"[MeSH]) | Humans<br>English<br>2012-end |
| <b>2</b> | <b>How should volume loading be managed?</b>                                                                                                                                                                                                                                                                                                                                                                                                                                                                                                                                                                                                                                                                                                                                                                                                                                     |                               |
|          | ("Blood Substitutes"[MeSH] OR "Fluorocarbons"[MeSH] OR "Plasma Substitutes"[MeSH] OR "Fluorocarbons"[MeSH] OR "Plasma Substitutes"[MeSH] OR "Fluid Therapy"[MeSH] OR "Rehydration Solutions"[MeSH] OR "Solutions"[MeSH] OR "Colloids"[MeSH] OR "Sodium Chloride"[MeSH] OR "Saline Solution, Hypertonic"[MeSH]) AND ("Wounds and Injuries"[MeSH] OR "Cranio-cerebral Trauma"[MeSH] OR "Cerebrovascular Trauma"[MeSH] OR "Multiple Trauma"[MeSH] OR "Trauma, Nervous System"[MeSH] OR "Head Injuries, Penetrating"[MeSH] OR "Carotid Artery Injuries"[MeSH] OR "Head Injuries, Closed"[MeSH] OR "Spinal Cord Injuries"[MeSH] OR "Traumatology"[MeSH] OR "Brain Injuries"[MeSH]) AND ("Infusions, Parenteral"[MeSH] OR "Infusions, Intravenous"[MeSH])                                                                                                                              | Humans<br>English<br>2012-end |
| <b>3</b> | <b>Does the blood pressure achieved during initial resuscitation influence morbidity or outcome in the trauma patient?</b>                                                                                                                                                                                                                                                                                                                                                                                                                                                                                                                                                                                                                                                                                                                                                       |                               |
|          | ("Blood Pressure Determination"[MeSH] OR "Blood Pressure"[MeSH] OR "Blood Pressure Monitoring, Ambulatory"[MeSH] OR "Hypertension"[MeSH] OR "Venous Pressure"[MeSH] OR "Hypotension"[MeSH]) AND ("Wounds and Injuries"[MeSH] OR "Cranio-cerebral Trauma"[MeSH] OR "Cerebrovascular Trauma"[MeSH] OR "Multiple Trauma"[MeSH] OR "Trauma, Nervous System"[MeSH] OR "Head Injuries, Penetrating"[MeSH] OR "Carotid Artery Injuries"[MeSH] OR "Head Injuries, Closed"[MeSH] OR "Spinal Cord Injuries"[MeSH] OR "Traumatology"[MeSH] OR "Brain Injuries"[MeSH]) AND ("Emergencies"[MeSH] OR "Emergency Treatment"[MeSH] OR "Emergency Medicine"[MeSH] OR "Emergency Medical Technicians"[MeSH])                                                                                                                                                                                       | Humans<br>English<br>2012-end |
| <b>4</b> | <b>Does the type of fluid used for initial resuscitation influence morbidity or outcome in the trauma patient?</b>                                                                                                                                                                                                                                                                                                                                                                                                                                                                                                                                                                                                                                                                                                                                                               |                               |
|          | ("Blood Substitutes"[MeSH] OR "Fluorocarbons"[MeSH] OR "Plasma Substitutes"[MeSH] OR "Fluorocarbons"[MeSH] OR "Plasma Substitutes"[MeSH] OR "Fluid Therapy"[MeSH] OR "Rehydration Solutions"[MeSH] OR "Solutions"[MeSH] OR "Colloids"[MeSH] OR "Sodium Chloride"[MeSH] OR "Saline Solution, Hypertonic"[MeSH]) AND ("Wounds and Injuries"[MeSH] OR "Cranio-cerebral Trauma"[MeSH] OR "Cerebrovascular Trauma"[MeSH] OR "Multiple Trauma"[MeSH] OR "Trauma, Nervous System"[MeSH] OR "Head Injuries, Penetrating"[MeSH] OR "Carotid Artery Injuries"[MeSH] OR "Head Injuries, Closed"[MeSH] OR "Spinal Cord Injuries"[MeSH] OR "Traumatology"[MeSH] OR "Brain Injuries"[MeSH]) AND ("Emergencies"[MeSH] OR "Emergency Treatment"[MeSH] OR "Emergency Medicine"[MeSH] OR "Emergency Medical Technicians"[MeSH])                                                                    | Humans<br>English<br>2012-end |
| <b>5</b> | <b>Does controlled mild hypothermia (34°C) affect outcome or morbidity in the trauma patient compared to normothermia?</b>                                                                                                                                                                                                                                                                                                                                                                                                                                                                                                                                                                                                                                                                                                                                                       |                               |
|          | ("Hypothermia"[MeSH] OR "Gastric Hypothermia"[MeSH] OR "Hypothermia, Induced"[MeSH] OR "Circulatory Arrest, Deep Hypothermia Induced"[MeSH]) AND "Outcome and Process Assessment (Health Care)"[MeSH] AND ("Wounds and Injuries"[MeSH] OR "injuries"[Subheading] OR "Cranio-cerebral Trauma"[MeSH] OR "Trauma Severity Indices"[MeSH] OR "Trauma Centers"[MeSH] OR "Cumulative Trauma Disorders"[MeSH] OR "Cerebrovascular Trauma"[MeSH] OR "Multiple Trauma"[MeSH] OR "Trauma, Nervous System"[MeSH] OR "Head Injuries, Penetrating"[MeSH] OR "Abducens Nerve Injury"[MeSH] OR "Optic Nerve Injuries"[MeSH] OR "Coma, Post-Head Injury"[MeSH] OR "Facial Nerve Injuries"[MeSH] OR "Carotid Artery Injuries"[MeSH] OR "Head Injuries, Closed"[MeSH] OR "Spinal Cord Injuries"[MeSH] OR "Traumatology"[MeSH] OR "Brain Injuries"[MeSH])                                           | Humans<br>English<br>2012-end |
| <b>6</b> | <b>Which types of colloids are appropriate for use under which circumstances in the bleeding trauma patient?</b>                                                                                                                                                                                                                                                                                                                                                                                                                                                                                                                                                                                                                                                                                                                                                                 |                               |

**The European guideline on management of major bleeding and coagulopathy following trauma:  
Fourth edition**

Rossaint R, Bouillon B, Cerny V, Coats TJ, Duranteau J, Fernández-Mondéjar E, Filipescu D, Hunt BJ, Komadina R, Nardi G, Neugebauer EAM, Ozier Y, Riddez L, Schultz A, Vincent J-L, Spahn DR

|           |                                                                                                                                                                                                                                                                                                                                                                                                                                                                                                                                                                         |                               |
|-----------|-------------------------------------------------------------------------------------------------------------------------------------------------------------------------------------------------------------------------------------------------------------------------------------------------------------------------------------------------------------------------------------------------------------------------------------------------------------------------------------------------------------------------------------------------------------------------|-------------------------------|
|           | ("Wounds and Injuries"[MeSH] OR "Craniocerebral Trauma"[MeSH] OR "Cerebrovascular Trauma"[MeSH] OR "Multiple Trauma"[MeSH] OR "Trauma, Nervous System"[MeSH] OR "Head Injuries, Penetrating"[MeSH] OR "Carotid Artery Injuries"[MeSH] OR "Head Injuries, Closed"[MeSH] OR "Spinal Cord Injuries"[MeSH] OR "Traumatology"[MeSH] OR "Brain Injuries"[MeSH]) AND ("Emergencies"[MeSH] OR "Emergency Treatment"[MeSH] OR "Emergency Medicine"[MeSH] OR "Emergency Medical Technicians"[MeSH]) AND "Colloids"[MeSH]                                                          | Humans<br>English             |
| <b>7</b>  | <b>Which types of crystalloids are appropriate for use under which circumstances in the bleeding trauma patient?</b>                                                                                                                                                                                                                                                                                                                                                                                                                                                    |                               |
| <b>8</b>  | <b>Is the use of Ringer's lactate appropriate in patients with severe head injury?</b>                                                                                                                                                                                                                                                                                                                                                                                                                                                                                  |                               |
|           | ("Wounds and Injuries"[MeSH] OR "Craniocerebral Trauma"[MeSH] OR "Cerebrovascular Trauma"[MeSH] OR "Multiple Trauma"[MeSH] OR "Trauma, Nervous System"[MeSH] OR "Head Injuries, Penetrating"[MeSH] OR "Carotid Artery Injuries"[MeSH] OR "Head Injuries, Closed"[MeSH] OR "Spinal Cord Injuries"[MeSH] OR "Traumatology"[MeSH] OR "Brain Injuries"[MeSH]) AND ("Emergencies"[MeSH] OR "Emergency Treatment"[MeSH] OR "Emergency Medicine"[MeSH] OR "Emergency Medical Technicians"[MeSH]) AND ("Sodium Chloride"[MeSH] OR "Saline Solution, Hypertonic"[MeSH])          | Humans<br>English             |
| <b>9</b>  | <b>Is there an appropriate use of vasopressors or inotropic agents in the bleeding trauma patient?</b>                                                                                                                                                                                                                                                                                                                                                                                                                                                                  |                               |
| <b>10</b> | <b>Are vasopressors or inotropic agents harmful in the bleeding trauma patient?</b>                                                                                                                                                                                                                                                                                                                                                                                                                                                                                     |                               |
|           | ("Emergencies"[MAJR] OR "Emergency Treatment"[ MAJR] OR "Emergency Medicine"[ MAJR] OR "Emergency Medical Technicians"[ MAJR] OR "Wounds and Injuries"[ MAJR] OR "Craniocerebral Trauma"[ MAJR] OR "Cerebrovascular Trauma"[ MAJR] OR "Multiple Trauma"[ MAJR] OR "Trauma, Nervous System"[ MAJR] OR "Head Injuries, Penetrating"[ MAJR] OR "Carotid Artery Injuries"[ MAJR] OR "Head Injuries, Closed"[ MAJR] OR "Spinal Cord Injuries"[ MAJR] OR "Traumatology"[ MAJR] OR "Brain Injuries"[ MAJR]) AND ("Vasoconstrictor Agents"[Mesh] OR "Cardiotonic Agents"[MeSH]) | Humans<br>English<br>10 years |
| <b>11</b> | <b>What is the indication for the use of RBC in bleeding after trauma?</b>                                                                                                                                                                                                                                                                                                                                                                                                                                                                                              |                               |
| <b>12</b> | <b>Does administration of RBCs affect clinical outcome in bleeding patients?</b>                                                                                                                                                                                                                                                                                                                                                                                                                                                                                        |                               |
| <b>13</b> | <b>What are the risks of giving RBCs?</b>                                                                                                                                                                                                                                                                                                                                                                                                                                                                                                                               |                               |
| <b>14</b> | <b>How many RBCs are enough?</b>                                                                                                                                                                                                                                                                                                                                                                                                                                                                                                                                        |                               |
|           | ("Wounds and Injuries"[MeSH] OR "Craniocerebral Trauma"[MeSH] OR "Cerebrovascular Trauma"[MeSH] OR "Multiple Trauma"[MeSH] OR "Trauma, Nervous System"[MeSH] OR "Head Injuries, Penetrating"[MeSH] OR "Carotid Artery Injuries"[MeSH] OR "Head Injuries, Closed"[MeSH] OR "Spinal Cord Injuries"[MeSH] OR "Traumatology"[MeSH] OR "Brain Injuries"[MeSH]) AND ("Erythrocytes"[MeSH] OR "Erythrocyte Transfusion"[MeSH])                                                                                                                                                 | Humans<br>English<br>2012-end |
| <b>15</b> | <b>What is the effect of RBC transfusion on microcirculation?</b>                                                                                                                                                                                                                                                                                                                                                                                                                                                                                                       |                               |
|           | ("Wounds and Injuries"[MeSH] OR "Craniocerebral Trauma"[MeSH] OR "Cerebrovascular Trauma"[MeSH] OR "Multiple Trauma"[MeSH] OR "Trauma, Nervous System"[MeSH] OR "Head Injuries, Penetrating"[MeSH] OR "Carotid Artery Injuries"[MeSH] OR "Head Injuries, Closed"[MeSH] OR "Spinal Cord Injuries"[MeSH] OR "Traumatology"[MeSH] OR "Brain Injuries"[MeSH]) AND ("Erythrocytes"[MeSH] OR "Erythrocyte Transfusion"[MeSH]) AND "Microcirculation"[Mesh]                                                                                                                    | Humans<br>English             |
| <b>16</b> | <b>Does the duration of RBC storage affect clinical outcome?</b>                                                                                                                                                                                                                                                                                                                                                                                                                                                                                                        |                               |
|           | ("Wounds and Injuries"[MeSH] OR "Craniocerebral Trauma"[MeSH] OR "Cerebrovascular Trauma"[MeSH] OR "Multiple Trauma"[MeSH] OR "Trauma, Nervous System"[MeSH] OR "Head Injuries, Penetrating"[MeSH] OR "Carotid Artery Injuries"[MeSH] OR "Head Injuries, Closed"[MeSH] OR "Spinal Cord Injuries"[MeSH] OR "Traumatology"[MeSH] OR "Brain Injuries"[MeSH]) AND ("Erythrocytes"[MeSH] OR "Erythrocyte Transfusion"[MeSH]) AND "Blood Preservation"[Mesh]                                                                                                                  | Humans<br>English             |
| <b>17</b> | <b>What is the appropriate use of epoetin in post-traumatic anaemia?</b>                                                                                                                                                                                                                                                                                                                                                                                                                                                                                                |                               |

**The European guideline on management of major bleeding and coagulopathy following trauma:  
Fourth edition**

Rossaint R, Bouillon B, Cerny V, Coats TJ, Duranteau J, Fernández-Mondéjar E, Filipescu D, Hunt BJ, Komadina R, Nardi G, Neugebauer EAM, Ozier Y, Riddez L, Schultz A, Vincent J-L, Spahn DR

|           |                                                                                                                                                                                                                                                                                                                                                                                                                                                                                                                                                                                                                                                                                                                                                                                                                                                                                     |                               |
|-----------|-------------------------------------------------------------------------------------------------------------------------------------------------------------------------------------------------------------------------------------------------------------------------------------------------------------------------------------------------------------------------------------------------------------------------------------------------------------------------------------------------------------------------------------------------------------------------------------------------------------------------------------------------------------------------------------------------------------------------------------------------------------------------------------------------------------------------------------------------------------------------------------|-------------------------------|
|           | ("Wounds and Injuries"[MeSH] OR "Craniocerebral Trauma"[MeSH] OR "Cerebrovascular Trauma"[MeSH] OR "Multiple Trauma"[MeSH] OR "Trauma, Nervous System"[MeSH] OR "Head Injuries, Penetrating"[MeSH] OR "Carotid Artery Injuries"[MeSH] OR "Head Injuries, Closed"[MeSH] OR "Spinal Cord Injuries"[MeSH] OR "Traumatology"[MeSH] OR "Brain Injuries"[MeSH]) AND ("Erythrocytes"[MeSH] OR "Erythrocyte Transfusion"[MeSH] OR "Anemia"[Mesh]) AND "Erythropoietin"[Mesh]                                                                                                                                                                                                                                                                                                                                                                                                                | Humans<br>English             |
| <b>18</b> | <b>Is there a role for iron therapy in the treatment of post-traumatic anaemia?</b>                                                                                                                                                                                                                                                                                                                                                                                                                                                                                                                                                                                                                                                                                                                                                                                                 |                               |
|           | ("Wounds and Injuries"[MeSH] OR "Craniocerebral Trauma"[MeSH] OR "Cerebrovascular Trauma"[MeSH] OR "Multiple Trauma"[MeSH] OR "Trauma, Nervous System"[MeSH] OR "Head Injuries, Penetrating"[MeSH] OR "Carotid Artery Injuries"[MeSH] OR "Head Injuries, Closed"[MeSH] OR "Spinal Cord Injuries"[MeSH] OR "Traumatology"[MeSH] OR "Brain Injuries"[MeSH]) AND ("Erythrocytes"[MeSH] OR "Erythrocyte Transfusion"[MeSH] OR "Anemia"[Mesh]) AND "Iron"[Mesh]                                                                                                                                                                                                                                                                                                                                                                                                                          | Humans<br>English             |
| <b>19</b> | <b>Should treatment target cardiac output?</b>                                                                                                                                                                                                                                                                                                                                                                                                                                                                                                                                                                                                                                                                                                                                                                                                                                      |                               |
|           | ("Oxygen Consumption"[MeSH] OR "Blood Gas Monitoring, Transcutaneous"[MeSH] OR "Blood Gas Analysis"[MeSH] OR "Gases"[MeSH] OR "Cell Respiration"[MeSH] OR "Blood Substitutes"[MeSH] OR "Blood Chemical Analysis"[MeSH] OR "Respiratory Function Tests"[MeSH] OR "Oximetry"[MeSH] OR "Blood Pressure"[MeSH] OR "Venous Pressure"[MeSH] OR "Hypotension"[MeSH]) AND ("Emergencies"[MeSH] OR "Emergency Treatment"[MeSH] OR "Emergency Medicine"[MeSH] OR "Emergency Medical Technicians"[MeSH] OR "Wounds and Injuries"[MeSH] OR "Craniocerebral Trauma"[MeSH] OR "Cerebrovascular Trauma"[MeSH] OR "Multiple Trauma"[MeSH] OR "Trauma, Nervous System"[MeSH] OR "Head Injuries, Penetrating"[MeSH] OR "Carotid Artery Injuries"[MeSH] OR "Head Injuries, Closed"[MeSH] OR "Spinal Cord Injuries"[MeSH] OR "Traumatology"[MeSH] OR "Brain Injuries"[MeSH]) AND "Cardiac Output"[Mesh] | Humans<br>English<br>10 years |
| <b>20</b> | <b>What is the effect of different infusion fluids (colloids, crystalloids) on coagulation?</b>                                                                                                                                                                                                                                                                                                                                                                                                                                                                                                                                                                                                                                                                                                                                                                                     |                               |
|           | ("Wounds and Injuries"[MeSH] OR "Craniocerebral Trauma"[MeSH] OR "Cerebrovascular Trauma"[MeSH] OR "Multiple Trauma"[MeSH] OR "Trauma, Nervous System"[MeSH] OR "Head Injuries, Penetrating"[MeSH] OR "Carotid Artery Injuries"[MeSH] OR "Head Injuries, Closed"[MeSH] OR "Spinal Cord Injuries"[MeSH] OR "Traumatology"[MeSH] OR "Brain Injuries"[MeSH]) AND ("Hemorrhage"[Mesh] OR "Disseminated Intravascular Coagulation"[Mesh]) AND ("Colloids"[MeSH] OR "Sodium Chloride"[MeSH] OR "Saline Solution, Hypertonic"[MeSH])                                                                                                                                                                                                                                                                                                                                                       | Humans<br>English<br>10 years |
| <b>21</b> | <b>Is there a role for hypertonic solutions in polytrauma patients?</b>                                                                                                                                                                                                                                                                                                                                                                                                                                                                                                                                                                                                                                                                                                                                                                                                             |                               |
| <b>22</b> | <b>Is there a role for hypertonic solutions in patients with traumatic brain injury?</b>                                                                                                                                                                                                                                                                                                                                                                                                                                                                                                                                                                                                                                                                                                                                                                                            |                               |
|           | ("Wounds and Injuries"[MeSH] OR "Craniocerebral Trauma"[MeSH] OR "Cerebrovascular Trauma"[MeSH] OR "Multiple Trauma"[MeSH] OR "Trauma, Nervous System"[MeSH] OR "Head Injuries, Penetrating"[MeSH] OR "Carotid Artery Injuries"[MeSH] OR "Head Injuries, Closed"[MeSH] OR "Spinal Cord Injuries"[MeSH] OR "Traumatology"[MeSH] OR "Brain Injuries"[MeSH]) AND ("Hemorrhage"[Mesh] OR "Disseminated Intravascular Coagulation"[Mesh]) AND "Hypertonic Solutions"[Mesh]                                                                                                                                                                                                                                                                                                                                                                                                               | Humans<br>English<br>10 years |
| <b>23</b> | <b>Does the age of the patient affect clinical outcome?</b>                                                                                                                                                                                                                                                                                                                                                                                                                                                                                                                                                                                                                                                                                                                                                                                                                         |                               |
|           | ("Wounds and Injuries"[MeSH] OR "Craniocerebral Trauma"[MeSH] OR "Cerebrovascular Trauma"[MeSH] OR "Multiple Trauma"[MeSH] OR "Trauma, Nervous System"[MeSH] OR "Head Injuries, Penetrating"[MeSH] OR "Carotid Artery Injuries"[MeSH] OR "Head Injuries, Closed"[MeSH] OR "Spinal Cord Injuries"[MeSH] OR "Traumatology"[MeSH] OR "Brain Injuries"[MeSH]) AND ("Erythrocytes"[MeSH] OR "Erythrocyte Transfusion"[MeSH]) AND ("Age Factors"[MeSH] OR "Aged"[MeSH] OR "Geriatrics"[Mesh])                                                                                                                                                                                                                                                                                                                                                                                             | Humans<br>English<br>10 years |
| <b>24</b> | <b>Does the minimisation of blood sampling volume and frequency improve outcome?</b>                                                                                                                                                                                                                                                                                                                                                                                                                                                                                                                                                                                                                                                                                                                                                                                                |                               |
|           | ("Hemorrhage"[Mesh] OR "Disseminated Intravascular Coagulation"[Mesh]) AND "Blood Specimen Collection"[Mesh]                                                                                                                                                                                                                                                                                                                                                                                                                                                                                                                                                                                                                                                                                                                                                                        | Humans<br>English<br>10 years |
| <b>IV</b> | <b>RAPID CONTROL OF BLEEDING</b>                                                                                                                                                                                                                                                                                                                                                                                                                                                                                                                                                                                                                                                                                                                                                                                                                                                    |                               |

**The European guideline on management of major bleeding and coagulopathy following trauma:  
Fourth edition**

Rossaint R, Bouillon B, Cerny V, Coats TJ, Duranteau J, Fernández-Mondéjar E, Filipescu D, Hunt BJ, Komadina R, Nardi G, Neugebauer EAM, Ozier Y, Riddez L, Schultz A, Vincent J-L, Spahn DR

|          |                                                                                                                                                                                                                                                                                                                                                                                                                                                                                                                                                                                                                                                                                                                                                                                                                                      |                               |
|----------|--------------------------------------------------------------------------------------------------------------------------------------------------------------------------------------------------------------------------------------------------------------------------------------------------------------------------------------------------------------------------------------------------------------------------------------------------------------------------------------------------------------------------------------------------------------------------------------------------------------------------------------------------------------------------------------------------------------------------------------------------------------------------------------------------------------------------------------|-------------------------------|
| <b>1</b> | <b>Can the mechanism of injury (e.g. blunt vs. penetrating trauma) be used as a determinant for deciding which patients in haemorrhagic shock are candidates for surgical bleeding control?</b>                                                                                                                                                                                                                                                                                                                                                                                                                                                                                                                                                                                                                                      |                               |
|          | "Wounds and Injuries"[MAJR] AND "Hemorrhage"[MeSH] AND "Shock, Hemorrhagic"[MeSH] AND ("Emergencies"[MeSH] OR "Emergency Treatment"[MeSH] OR "Emergency Medicine"[MeSH] OR "Emergency Medical Technicians"[MeSH])                                                                                                                                                                                                                                                                                                                                                                                                                                                                                                                                                                                                                    | Humans<br>English<br>2012-end |
| <b>2</b> | <b>Does angiographic embolisation improve the outcome of patients with haemorrhagic shock and pelvic ring disruption?</b>                                                                                                                                                                                                                                                                                                                                                                                                                                                                                                                                                                                                                                                                                                            |                               |
|          | "Embolization, Therapeutic"[MeSH] AND ("Shock, Hemorrhagic"[MeSH] OR "Fractures"[MeSH])                                                                                                                                                                                                                                                                                                                                                                                                                                                                                                                                                                                                                                                                                                                                              | Humans<br>English<br>2012-end |
| <b>3</b> | <b>What are the characteristics of patients with free intraabdominal fluid according to FAST in whom secondary diagnostics (i.e. CT scan) can be safely performed?</b>                                                                                                                                                                                                                                                                                                                                                                                                                                                                                                                                                                                                                                                               |                               |
|          | "Wounds and Injuries"[MeSH] AND ("Diagnostic Imaging"[MeSH] OR "Ultrasonography"[MeSH]) AND "Ascitic Fluid"[MeSH]                                                                                                                                                                                                                                                                                                                                                                                                                                                                                                                                                                                                                                                                                                                    | Humans<br>English<br>2012-end |
| <b>4</b> | <b>What characterises the patient in haemorrhagic shock in whom immediate aortic cross-clamping is warranted?</b>                                                                                                                                                                                                                                                                                                                                                                                                                                                                                                                                                                                                                                                                                                                    |                               |
| <b>5</b> | <b>Does use of an intra-aortic balloon catheter reduce bleeding or improve clinical outcomes?</b>                                                                                                                                                                                                                                                                                                                                                                                                                                                                                                                                                                                                                                                                                                                                    |                               |
|          | "Wounds and Injuries"[MAJR] AND ("Hemorrhage"[MeSH] OR "Shock, Hemorrhagic"[MeSH]) AND ("Emergencies"[MeSH] OR "Emergency Treatment"[MeSH] OR "Emergency Medicine"[MeSH] OR "Emergency Medical Technicians"[MeSH]) AND ("Angioscopy"[MeSH] OR "Heart-Assist Devices"[Mesh] OR "Cardiovascular Surgical Procedures"[MeSH] OR "Minimally Invasive Surgical Procedures"[Mesh] OR "Intra-Aortic Balloon Pumping"[Mesh])                                                                                                                                                                                                                                                                                                                                                                                                                  | Humans<br>English<br>10 years |
| <b>6</b> | <b>Does the elapsed time from admission to OR influence outcome for trauma patients who need emergency surgery?</b>                                                                                                                                                                                                                                                                                                                                                                                                                                                                                                                                                                                                                                                                                                                  |                               |
|          | ("Emergency Medical Services"[MeSH] OR "Emergencies"[MeSH] OR "Emergency Treatment"[MeSH] OR "Critical Care"[MeSH]) AND "Hemorrhage"[MeSH] AND "Outcome and Process Assessment (Health Care)"[MeSH] AND ("Wounds and Injuries"[MeSH] OR "injuries"[Subheading] OR "Cranio-cerebral Trauma"[MeSH] OR "Trauma Severity Indices"[MeSH] OR "Trauma Centers"[MeSH] OR "Cumulative Trauma Disorders"[MeSH] OR "Cerebrovascular Trauma"[MeSH] OR "Multiple Trauma"[MeSH] OR "Trauma, Nervous System"[MeSH] OR "Head Injuries, Penetrating"[MeSH] OR "Abducens Nerve Injury"[MeSH] OR "Optic Nerve Injuries"[MeSH] OR "Coma, Post-Head Injury"[MeSH] OR "Facial Nerve Injuries"[MeSH] OR "Carotid Artery Injuries"[MeSH] OR "Head Injuries, Closed"[MeSH] OR "Spinal Cord Injuries"[MeSH] OR "Traumatology"[MeSH] OR "Brain Injuries"[MeSH]) | Humans<br>English<br>2012-end |
| <b>7</b> | <b>Does urgent surgery to control haemorrhage improve the outcome of patients with haemorrhagic shock and pelvic ring disruption?</b>                                                                                                                                                                                                                                                                                                                                                                                                                                                                                                                                                                                                                                                                                                |                               |
|          | "Hip Fractures"[MeSH] AND "Shock, Hemorrhagic"[MeSH]                                                                                                                                                                                                                                                                                                                                                                                                                                                                                                                                                                                                                                                                                                                                                                                 | Humans<br>English<br>2012-end |
| <b>8</b> | <b>What characterises the patient with free intraabdominal fluid according to FAST who requires immediate laparotomy?</b>                                                                                                                                                                                                                                                                                                                                                                                                                                                                                                                                                                                                                                                                                                            |                               |
|          | "Ascitic Fluid"[MeSH] AND "Laparotomy"[MeSH] AND ("Wounds and Injuries"[MeSH] OR "injuries"[Subheading] OR "Cranio-cerebral Trauma"[MeSH] OR "Trauma Severity Indices"[MeSH] OR "Trauma Centers"[MeSH] OR "Cumulative Trauma Disorders"[MeSH] OR "Cerebrovascular Trauma"[MeSH] OR "Multiple Trauma"[MeSH] OR "Trauma, Nervous System"[MeSH] OR "Head Injuries, Penetrating"[MeSH] OR "Abducens Nerve Injury"[MeSH] OR "Optic Nerve Injuries"[MeSH] OR "Coma, Post-Head Injury"[MeSH] OR "Facial Nerve Injuries"[MeSH] OR "Carotid Artery Injuries"[MeSH] OR "Head Injuries, Closed"[MeSH] OR "Spinal Cord Injuries"[MeSH] OR "Traumatology"[MeSH] OR "Brain Injuries"[MeSH])                                                                                                                                                        | Humans<br>English<br>2012-end |
| <b>9</b> | <b>What characterises the patient in haemorrhagic shock in whom packing is warranted?</b>                                                                                                                                                                                                                                                                                                                                                                                                                                                                                                                                                                                                                                                                                                                                            |                               |

**The European guideline on management of major bleeding and coagulopathy following trauma:  
Fourth edition**

Rossaint R, Bouillon B, Cerny V, Coats TJ, Duranteau J, Fernández-Mondéjar E, Filipescu D, Hunt BJ, Komadina R, Nardi G, Neugebauer EAM, Ozier Y, Riddez L, Schultz A, Vincent J-L, Spahn DR

|                                                            |                                                                                                                           |                                                                                                                                                                                                                                                                                                                                                                                                                                                                                                                                                                                                                                                             |                               |
|------------------------------------------------------------|---------------------------------------------------------------------------------------------------------------------------|-------------------------------------------------------------------------------------------------------------------------------------------------------------------------------------------------------------------------------------------------------------------------------------------------------------------------------------------------------------------------------------------------------------------------------------------------------------------------------------------------------------------------------------------------------------------------------------------------------------------------------------------------------------|-------------------------------|
|                                                            |                                                                                                                           | "Wounds and Injuries"[MeSH] AND ("Ascitic Fluid"[MeSH] OR "Shock, Hemorrhagic"[MeSH] OR "Hemorrhage"[MeSH]) AND "Abdominal Injuries"[Mesh] AND ("Hemostasis, Surgical"[Mesh] OR "Hemostatic Techniques"[Mesh] OR "Surgical Procedures, Minimally Invasive"[Mesh])                                                                                                                                                                                                                                                                                                                                                                                           | Humans<br>English<br>2012-end |
| <b>10</b>                                                  | <b>What characterises the patient in haemorrhagic shock in whom use of a tourniquet is warranted?</b>                     |                                                                                                                                                                                                                                                                                                                                                                                                                                                                                                                                                                                                                                                             |                               |
|                                                            |                                                                                                                           | "Wounds and Injuries"[MeSH] AND ("Hemorrhage"[MeSH] OR "Shock, Hemorrhagic"[MeSH]) AND "Tourniquets"[Mesh]                                                                                                                                                                                                                                                                                                                                                                                                                                                                                                                                                  | Humans<br>English<br>2012-end |
| <b>11</b>                                                  | <b>Does the use of local haemostatic agents improve outcome of patients with haemorrhagic shock?</b>                      |                                                                                                                                                                                                                                                                                                                                                                                                                                                                                                                                                                                                                                                             |                               |
|                                                            |                                                                                                                           | "Wounds and Injuries"[MeSH] AND ("Hemorrhage"[MeSH] OR "Shock, Hemorrhagic"[MeSH]) AND "Hemostatic Techniques"[Mesh] AND ("Fibrin Tissue Adhesive"[Mesh] OR "Fibrin Foam"[Mesh] OR "Gelatin Sponge, Absorbable"[Mesh] OR "Thrombin"[Mesh] OR "Thromboplastin"[Mesh])                                                                                                                                                                                                                                                                                                                                                                                        | Humans<br>English<br>2012-end |
| <b>12</b>                                                  | <b>Does urgent surgery to prevent further bleeding improve outcome for patients with haemorrhagic shock?</b>              |                                                                                                                                                                                                                                                                                                                                                                                                                                                                                                                                                                                                                                                             |                               |
|                                                            |                                                                                                                           | "Wounds and Injuries"[MeSH] AND ("Hemorrhage"[MeSH] OR "Shock, Hemorrhagic"[MeSH]) AND "Hemostasis, Surgical"[Mesh]                                                                                                                                                                                                                                                                                                                                                                                                                                                                                                                                         | Humans<br>English<br>2012-end |
| <b>V INITIAL MANAGEMENT OF BLEEDING &amp; COAGULOPATHY</b> |                                                                                                                           |                                                                                                                                                                                                                                                                                                                                                                                                                                                                                                                                                                                                                                                             |                               |
|                                                            | <b>FFP</b>                                                                                                                |                                                                                                                                                                                                                                                                                                                                                                                                                                                                                                                                                                                                                                                             |                               |
| <b>1</b>                                                   | <b>What is the indication for giving FFP to patients bleeding after trauma?</b>                                           |                                                                                                                                                                                                                                                                                                                                                                                                                                                                                                                                                                                                                                                             |                               |
| <b>2</b>                                                   | <b>Does administration of FFP reduce the severity of bleeding in patients with acquired coagulation factor deficits?</b>  |                                                                                                                                                                                                                                                                                                                                                                                                                                                                                                                                                                                                                                                             |                               |
| <b>3</b>                                                   | <b>Does administration of FFP affect clinical outcome in bleeding patients with acquired coagulation factor deficits?</b> |                                                                                                                                                                                                                                                                                                                                                                                                                                                                                                                                                                                                                                                             |                               |
| <b>4</b>                                                   | <b>What are the risks of administration of FFP?</b>                                                                       |                                                                                                                                                                                                                                                                                                                                                                                                                                                                                                                                                                                                                                                             |                               |
| <b>5</b>                                                   | <b>What is the recommended dose of FFP to be given?</b>                                                                   |                                                                                                                                                                                                                                                                                                                                                                                                                                                                                                                                                                                                                                                             |                               |
|                                                            |                                                                                                                           | ("Wounds and Injuries"[MeSH] OR "Craniocerebral Trauma"[MeSH] OR "Cerebrovascular Trauma"[MeSH] OR "Multiple Trauma"[MeSH] OR "Trauma, Nervous System"[MeSH] OR "Head Injuries, Penetrating"[MeSH] OR "Carotid Artery Injuries"[MeSH] OR "Head Injuries, Closed"[MeSH] OR "Spinal Cord Injuries"[MeSH] OR "Traumatology"[MeSH] OR "Brain Injuries"[MeSH]) AND ("Plasma"[MeSH] OR "Plasma Exchange"[MeSH])                                                                                                                                                                                                                                                   | Humans<br>English<br>2012-end |
| <b>6</b>                                                   | <b>What is the recommended dose of FFP relative to the dose of RBCs administered?</b>                                     |                                                                                                                                                                                                                                                                                                                                                                                                                                                                                                                                                                                                                                                             |                               |
| <b>7</b>                                                   | <b>Does the relative dose of FFP:RBCs have an impact on outcome?</b>                                                      |                                                                                                                                                                                                                                                                                                                                                                                                                                                                                                                                                                                                                                                             |                               |
| <b>8</b>                                                   | <b>Is there any benefit to a 1:1:1 transfusion regimen?</b>                                                               |                                                                                                                                                                                                                                                                                                                                                                                                                                                                                                                                                                                                                                                             |                               |
| <b>9</b>                                                   | <b>Is there any benefit to goal-directed coagulation management using factor replacement?</b>                             |                                                                                                                                                                                                                                                                                                                                                                                                                                                                                                                                                                                                                                                             |                               |
|                                                            |                                                                                                                           | ("Emergencies"[MeSH] OR "Emergency Treatment"[MeSH] OR "Emergency Medicine"[MeSH] OR "Emergency Medical Technicians"[MeSH] OR "Wounds and Injuries"[MeSH] OR "Craniocerebral Trauma"[MeSH] OR "Cerebrovascular Trauma"[MeSH] OR "Multiple Trauma"[MeSH] OR "Trauma, Nervous System"[MeSH] OR "Head Injuries, Penetrating"[MeSH] OR "Carotid Artery Injuries"[MeSH] OR "Head Injuries, Closed"[MeSH] OR "Spinal Cord Injuries"[MeSH] OR "Traumatology"[MeSH] OR "Brain Injuries"[MeSH]) AND ("Erythrocytes"[MeSH] OR "Erythrocyte Transfusion"[MeSH]) AND ("Plasma"[MeSH] OR "Plasma Exchange"[MeSH] OR "Blood Platelets"[MeSH] OR "Thrombocytopenia"[MeSH]) | Humans<br>English             |
|                                                            | <b>Anti-fibrinolytic agents</b>                                                                                           |                                                                                                                                                                                                                                                                                                                                                                                                                                                                                                                                                                                                                                                             |                               |

**The European guideline on management of major bleeding and coagulopathy following trauma:  
Fourth edition**

Rossaint R, Bouillon B, Cerny V, Coats TJ, Duranteau J, Fernández-Mondéjar E, Filipescu D, Hunt BJ, Komadina R, Nardi G, Neugebauer EAM, Ozier Y, Riddez L, Schultz A, Vincent J-L, Spahn DR

|           |                              |                                                                                                                                                                                                                                                                                                                                                                                                                                                                                                                                                                                                                                                               |                               |
|-----------|------------------------------|---------------------------------------------------------------------------------------------------------------------------------------------------------------------------------------------------------------------------------------------------------------------------------------------------------------------------------------------------------------------------------------------------------------------------------------------------------------------------------------------------------------------------------------------------------------------------------------------------------------------------------------------------------------|-------------------------------|
|           | <b>1</b>                     | <b>What are the indications for anti-fibrinolytics in a bleeding patient?</b>                                                                                                                                                                                                                                                                                                                                                                                                                                                                                                                                                                                 |                               |
|           | <b>2</b>                     | <b>What are the recommended doses of anti-fibrinolytic agents in bleeding patients?</b>                                                                                                                                                                                                                                                                                                                                                                                                                                                                                                                                                                       |                               |
|           | <b>3</b>                     | <b>Have anti-fibrinolytics been shown to be efficacious?</b>                                                                                                                                                                                                                                                                                                                                                                                                                                                                                                                                                                                                  |                               |
|           | <b>4</b>                     | <b>What are the risks of using anti-fibrinolytics in bleeding patients?</b>                                                                                                                                                                                                                                                                                                                                                                                                                                                                                                                                                                                   |                               |
|           | <b>5</b>                     | <b>Which anti-fibrinolytic(s) are preferable based on comparative data and risk benefit analysis?</b>                                                                                                                                                                                                                                                                                                                                                                                                                                                                                                                                                         |                               |
|           | <b>6</b>                     | <b>Which antifibrinolytic agent(s) are appropriate for use in the bleeding trauma patient?</b>                                                                                                                                                                                                                                                                                                                                                                                                                                                                                                                                                                |                               |
|           | <b>7</b>                     | <b>Is the use of antifibrinolytic agents appropriate in all cases of suspected significant bleeding?</b>                                                                                                                                                                                                                                                                                                                                                                                                                                                                                                                                                      |                               |
|           | <b>8</b>                     | <b>Does the timing of antifibrinolytic treatment affect outcome?</b>                                                                                                                                                                                                                                                                                                                                                                                                                                                                                                                                                                                          |                               |
|           |                              | "Antifibrinolytic Agents"[MeSH] AND ("Hemorrhage"[MeSH] OR "Brain Stem Hemorrhage, Traumatic"[MeSH] OR "Subarachnoid Hemorrhage"[MeSH] OR "Cerebral Hemorrhage"[MeSH] OR "Cerebral Hemorrhage, Traumatic"[MeSH] OR "Subarachnoid Hemorrhage, Traumatic"[MeSH] OR "Brain Hemorrhage, Traumatic"[MeSH] OR "Intracranial Hemorrhage, Traumatic"[MeSH]) NOT "Aprotinin"[Mesh]                                                                                                                                                                                                                                                                                     | Humans<br>English<br>2012-end |
|           | <b>9</b>                     | <b>Is the use of antifibrinolytic agents cost effective?</b>                                                                                                                                                                                                                                                                                                                                                                                                                                                                                                                                                                                                  |                               |
|           |                              | ("Hemorrhage"[MeSH] OR "Brain Stem Hemorrhage, Traumatic"[MeSH] OR "Subarachnoid Hemorrhage"[MeSH] OR "Cerebral Hemorrhage"[MeSH] OR "Cerebral Hemorrhage, Traumatic"[MeSH] OR "Subarachnoid Hemorrhage, Traumatic"[MeSH] OR "Brain Hemorrhage, Traumatic"[MeSH] OR "Intracranial Hemorrhage, Traumatic"[MeSH]) AND "Antifibrinolytic Agents"[MeSH] NOT "Aprotinin"[Mesh] AND ("Costs and Cost Analysis"[Mesh] OR "Cost-Benefit Analysis"[Mesh] OR "Cost of Illness"[Mesh] OR "Cost Savings"[Mesh] OR "Health Care Costs"[Mesh] OR "Hospital Costs"[Mesh] OR "Drug Costs"[Mesh])                                                                              | Humans<br>English             |
|           |                              | <b>Coagulation factor concentrates</b>                                                                                                                                                                                                                                                                                                                                                                                                                                                                                                                                                                                                                        |                               |
|           | <b>1</b>                     | <b>What are the indications for the use of coagulation factor concentrates in a bleeding patient?</b>                                                                                                                                                                                                                                                                                                                                                                                                                                                                                                                                                         |                               |
|           | <b>2</b>                     | <b>What are the recommended doses of coagulation factor concentrates in a bleeding patient?</b>                                                                                                                                                                                                                                                                                                                                                                                                                                                                                                                                                               |                               |
|           | <b>3</b>                     | <b>Have coagulation factor concentrates been shown to be efficacious?</b>                                                                                                                                                                                                                                                                                                                                                                                                                                                                                                                                                                                     |                               |
|           | <b>4</b>                     | <b>What are the risks of using coagulation factor concentrates in bleeding patients?</b>                                                                                                                                                                                                                                                                                                                                                                                                                                                                                                                                                                      |                               |
|           |                              | ("Emergencies"[MeSH] OR "Emergency Treatment"[MeSH] OR "Emergency Medicine"[MeSH] OR "Emergency Medical Technicians"[MeSH] OR "Wounds and Injuries"[MeSH] OR "Craniocerebral Trauma"[MeSH] OR "Cerebrovascular Trauma"[MeSH] OR "Multiple Trauma"[MeSH] OR "Trauma, Nervous System"[MeSH] OR "Head Injuries, Penetrating"[MeSH] OR "Carotid Artery Injuries"[MeSH] OR "Head Injuries, Closed"[MeSH] OR "Spinal Cord Injuries"[MeSH] OR "Traumatology"[MeSH] OR "Brain Injuries"[MeSH]) AND ("Factor XIII"[Mesh] OR "recombinant FVIIa" [Supplementary Concept])                                                                                               | Humans<br>English<br>2012-end |
|           |                              | <b>Antithrombotic management</b>                                                                                                                                                                                                                                                                                                                                                                                                                                                                                                                                                                                                                              |                               |
|           | <b>1</b>                     | <b>What type of antithrombotic therapy is appropriate following traumatic injury?</b>                                                                                                                                                                                                                                                                                                                                                                                                                                                                                                                                                                         |                               |
|           | <b>2</b>                     | <b>How can the effect of antithrombotic agents be antagonised if necessary to support coagulation?</b>                                                                                                                                                                                                                                                                                                                                                                                                                                                                                                                                                        |                               |
|           |                              | ("Emergencies"[MAJR] OR "Emergency Treatment"[ MAJR] OR "Emergency Medicine"[ MAJR] OR "Emergency Medical Technicians"[ MAJR] OR "Wounds and Injuries"[ MAJR] OR "Craniocerebral Trauma"[ MAJR] OR "Cerebrovascular Trauma"[ MAJR] OR "Multiple Trauma"[ MAJR] OR "Trauma, Nervous System"[ MAJR] OR "Head Injuries, Penetrating"[ MAJR] OR "Carotid Artery Injuries"[ MAJR] OR "Head Injuries, Closed"[ MAJR] OR "Spinal Cord Injuries"[ MAJR] OR "Traumatology"[ MAJR] OR "Brain Injuries"[ MAJR]) AND ("Thrombosis/prevention and control"[Mesh] OR "Venous Thrombosis/prevention and control"[Mesh] OR "Pulmonary Embolism/prevention and control"[Mesh]) | Humans<br>English<br>2012-end |
| <b>VI</b> | <b>FURTHER RESUSCITATION</b> |                                                                                                                                                                                                                                                                                                                                                                                                                                                                                                                                                                                                                                                               |                               |

**The European guideline on management of major bleeding and coagulopathy following trauma:  
Fourth edition**

Rossaint R, Bouillon B, Cerny V, Coats TJ, Duranteau J, Fernández-Mondéjar E, Filipescu D, Hunt BJ, Komadina R, Nardi G, Neugebauer EAM, Ozier Y, Riddez L, Schultz A, Vincent J-L, Spahn DR

|  |          |                                                                                                                                                                                                                                                                                                                                                                                                                                                                                                                                                                                                                                       |                               |
|--|----------|---------------------------------------------------------------------------------------------------------------------------------------------------------------------------------------------------------------------------------------------------------------------------------------------------------------------------------------------------------------------------------------------------------------------------------------------------------------------------------------------------------------------------------------------------------------------------------------------------------------------------------------|-------------------------------|
|  |          | <b><i>Goal directed therapy</i></b>                                                                                                                                                                                                                                                                                                                                                                                                                                                                                                                                                                                                   |                               |
|  | <b>1</b> | <b>Which coagulation monitoring tools can be used to support resuscitation?</b>                                                                                                                                                                                                                                                                                                                                                                                                                                                                                                                                                       |                               |
|  |          | ("Wounds and Injuries"[MeSH] OR "Hemorrhage"[Mesh]) AND ("Emergencies"[MeSH] OR "Emergency Treatment"[MeSH] OR "Emergency Medicine"[MeSH] OR "Emergency Medical Technicians"[MeSH]) AND ("Diagnosis"[MeSH] OR "Monitoring, Physiologic"[MeSH] OR "Point-of-Care Systems"[Mesh] OR "Thrombelastography"[Mesh] OR "Predictive Value of Tests"[Mesh]) AND "Resuscitation"[Mesh] AND "Blood Coagulation Tests"[Mesh]                                                                                                                                                                                                                      | Humans<br>English<br>10 years |
|  |          | <b><i>Platelets</i></b>                                                                                                                                                                                                                                                                                                                                                                                                                                                                                                                                                                                                               |                               |
|  | <b>1</b> | <b>What is the indication for the use of platelets in bleeding after trauma?</b>                                                                                                                                                                                                                                                                                                                                                                                                                                                                                                                                                      |                               |
|  | <b>2</b> | <b>Does administration of platelets reduce the severity of bleeding in patients with thrombocytopenia?</b>                                                                                                                                                                                                                                                                                                                                                                                                                                                                                                                            |                               |
|  | <b>3</b> | <b>Does administration of platelets affect clinical outcome in bleeding patients with thrombocytopenia?</b>                                                                                                                                                                                                                                                                                                                                                                                                                                                                                                                           |                               |
|  | <b>4</b> | <b>Does administration of platelets affect clinical outcome in bleeding patients without thrombocytopenia?</b>                                                                                                                                                                                                                                                                                                                                                                                                                                                                                                                        |                               |
|  | <b>5</b> | <b>What are the risks of giving platelets?</b>                                                                                                                                                                                                                                                                                                                                                                                                                                                                                                                                                                                        |                               |
|  |          | ("Blood Platelets"[MeSH] OR "Thrombocytopenia"[MeSH]) AND ("Wounds and Injuries"[MeSH] OR "Craniocerebral Trauma"[MeSH] OR "Cerebrovascular Trauma"[MeSH] OR "Multiple Trauma"[MeSH] OR "Trauma, Nervous System"[MeSH] OR "Head Injuries, Penetrating"[MeSH] OR "Carotid Artery Injuries"[MeSH] OR "Head Injuries, Closed"[MeSH] OR "Spinal Cord Injuries"[MeSH] OR "Traumatology"[MeSH] OR "Brain Injuries"[MeSH])                                                                                                                                                                                                                   | Humans<br>English<br>2012-end |
|  | <b>6</b> | <b>Does the duration of platelet storage affect clinical outcome?</b>                                                                                                                                                                                                                                                                                                                                                                                                                                                                                                                                                                 |                               |
|  |          | ("Wounds and Injuries"[MeSH] OR "Craniocerebral Trauma"[MeSH] OR "Cerebrovascular Trauma"[MeSH] OR "Multiple Trauma"[MeSH] OR "Trauma, Nervous System"[MeSH] OR "Head Injuries, Penetrating"[MeSH] OR "Carotid Artery Injuries"[MeSH] OR "Head Injuries, Closed"[MeSH] OR "Spinal Cord Injuries"[MeSH] OR "Traumatology"[MeSH] OR "Brain Injuries"[MeSH]) AND ("Blood Platelets"[MeSH] OR "Thrombocytopenia"[MeSH]) AND "Blood Preservation"[Mesh]                                                                                                                                                                                    | Humans<br>English             |
|  |          | <b><i>Anti-platelet agents</i></b>                                                                                                                                                                                                                                                                                                                                                                                                                                                                                                                                                                                                    |                               |
|  | <b>1</b> | <b>Does pre-medication with anti-platelet agents affect clinical outcome in bleeding patients with thrombocytopenia?</b>                                                                                                                                                                                                                                                                                                                                                                                                                                                                                                              |                               |
|  | <b>2</b> | <b>Does pre-medication with anti-platelet agents affect clinical outcome in bleeding patients who receive platelet therapy?</b>                                                                                                                                                                                                                                                                                                                                                                                                                                                                                                       |                               |
|  |          | ("Wounds and Injuries"[MeSH] OR "Craniocerebral Trauma"[MeSH] OR "Cerebrovascular Trauma"[MeSH] OR "Multiple Trauma"[MeSH] OR "Trauma, Nervous System"[MeSH] OR "Head Injuries, Penetrating"[MeSH] OR "Carotid Artery Injuries"[MeSH] OR "Head Injuries, Closed"[MeSH] OR "Spinal Cord Injuries"[MeSH] OR "Traumatology"[MeSH] OR "Brain Injuries"[MeSH]) AND "Platelet Aggregation Inhibitors"[Mesh]                                                                                                                                                                                                                                 | Humans<br>English<br>2012-end |
|  | <b>3</b> | <b>What is the appropriate use of platelets in the treatment of patients pre-treated with anti-platelet agents?</b>                                                                                                                                                                                                                                                                                                                                                                                                                                                                                                                   |                               |
|  |          | ("Emergencies"[MAJR] OR "Emergency Treatment"[ MAJR] OR "Emergency Medicine"[ MAJR] OR "Emergency Medical Technicians"[ MAJR] OR "Wounds and Injuries"[ MAJR] OR "Craniocerebral Trauma"[ MAJR] OR "Cerebrovascular Trauma"[ MAJR] OR "Multiple Trauma"[ MAJR] OR "Trauma, Nervous System"[ MAJR] OR "Head Injuries, Penetrating"[ MAJR] OR "Carotid Artery Injuries"[ MAJR] OR "Head Injuries, Closed"[ MAJR] OR "Spinal Cord Injuries"[ MAJR] OR "Traumatology"[ MAJR] OR "Brain Injuries"[ MAJR]) AND "Platelet Aggregation Inhibitors"[Mesh] AND ("Therapeutics"[Mesh] OR "Emergency Treatment"[Mesh] OR "Blood Platelets"[MeSH]) | Humans<br>English             |
|  |          | <b><i>Fibrinogen and cryoprecipitate</i></b>                                                                                                                                                                                                                                                                                                                                                                                                                                                                                                                                                                                          |                               |
|  | <b>1</b> | <b>What are the indications for fibrinogen or cryoprecipitate?</b>                                                                                                                                                                                                                                                                                                                                                                                                                                                                                                                                                                    |                               |

**The European guideline on management of major bleeding and coagulopathy following trauma:  
Fourth edition**

Rossaint R, Bouillon B, Cerny V, Coats TJ, Duranteau J, Fernández-Mondéjar E, Filipescu D, Hunt BJ, Komadina R, Nardi G, Neugebauer EAM, Ozier Y, Riddez L, Schultz A, Vincent J-L, Spahn DR

|  |          |                                                                                                                                                                                                                                                                                                                                                                                                                                                                                                                                                                                                                                                                                                                                                                                                                          |                               |
|--|----------|--------------------------------------------------------------------------------------------------------------------------------------------------------------------------------------------------------------------------------------------------------------------------------------------------------------------------------------------------------------------------------------------------------------------------------------------------------------------------------------------------------------------------------------------------------------------------------------------------------------------------------------------------------------------------------------------------------------------------------------------------------------------------------------------------------------------------|-------------------------------|
|  | <b>2</b> | <b>What is the recommended cryoprecipitate dose in bleeding patients?</b>                                                                                                                                                                                                                                                                                                                                                                                                                                                                                                                                                                                                                                                                                                                                                |                               |
|  | <b>3</b> | <b>Have fibrinogen or cryoprecipitate been shown to be efficacious in bleeding patients?</b>                                                                                                                                                                                                                                                                                                                                                                                                                                                                                                                                                                                                                                                                                                                             |                               |
|  | <b>4</b> | <b>What are the risks of using fibrinogen or cryoprecipitate in bleeding patients?</b>                                                                                                                                                                                                                                                                                                                                                                                                                                                                                                                                                                                                                                                                                                                                   |                               |
|  |          | ("Wounds and Injuries"[MeSH] OR "Craniocerebral Trauma"[MeSH] OR "Cerebrovascular Trauma"[MeSH] OR "Multiple Trauma"[MeSH] OR "Trauma, Nervous System"[MeSH] OR "Head Injuries, Penetrating"[MeSH] OR "Carotid Artery Injuries"[MeSH] OR "Head Injuries, Closed"[MeSH] OR "Spinal Cord Injuries"[MeSH] OR "Traumatology"[MeSH] OR "Brain Injuries"[MeSH]) AND ("Fibrinogen"[MeSH] OR "cryoprecipitate coagulum"[Substance Name] OR "Nour-Eldin fraction"[Substance Name])                                                                                                                                                                                                                                                                                                                                                | Humans<br>English<br>2012-end |
|  | <b>5</b> | <b>What is the recommended target fibrinogen level?</b>                                                                                                                                                                                                                                                                                                                                                                                                                                                                                                                                                                                                                                                                                                                                                                  |                               |
|  | <b>6</b> | <b>Which coagulation monitoring tools are most appropriate to detect fibrinogen level?</b>                                                                                                                                                                                                                                                                                                                                                                                                                                                                                                                                                                                                                                                                                                                               |                               |
|  |          | ("Emergencies"[MeSH] OR "Emergency Treatment"[MeSH] OR "Emergency Medicine"[MeSH] OR "Emergency Medical Technicians"[MeSH] OR "Wounds and Injuries"[MeSH] OR "Craniocerebral Trauma"[MeSH] OR "Cerebrovascular Trauma"[MeSH] OR "Multiple Trauma"[MeSH] OR "Trauma, Nervous System"[MeSH] OR "Head Injuries, Penetrating"[MeSH] OR "Carotid Artery Injuries"[MeSH] OR "Head Injuries, Closed"[MeSH] OR "Spinal Cord Injuries"[MeSH] OR "Traumatology"[MeSH] OR "Brain Injuries"[MeSH]) AND ("Fibrinogen"[MeSH] OR "cryoprecipitate coagulum"[Substance Name] OR "Nour-Eldin fraction"[Substance Name]) AND ("administration and dosage"[Subheading] OR "Monitoring, Physiologic"[Mesh] OR "Biomarkers, Pharmacological"[Mesh] OR "Drug Monitoring"[Mesh] OR "Point-of-Care Systems"[Mesh] OR "Thrombelastography"[Mesh]) | Humans<br>English<br>2012-end |
|  |          | <b><i>Prothrombin complex concentrates</i></b>                                                                                                                                                                                                                                                                                                                                                                                                                                                                                                                                                                                                                                                                                                                                                                           |                               |
|  | <b>1</b> | <b>What is the indication for PCCs in bleeding patients?</b>                                                                                                                                                                                                                                                                                                                                                                                                                                                                                                                                                                                                                                                                                                                                                             |                               |
|  | <b>2</b> | <b>What is the recommended dose of PCCs in bleeding patients?</b>                                                                                                                                                                                                                                                                                                                                                                                                                                                                                                                                                                                                                                                                                                                                                        |                               |
|  | <b>3</b> | <b>Have PCCs been shown to be efficacious in bleeding patients?</b>                                                                                                                                                                                                                                                                                                                                                                                                                                                                                                                                                                                                                                                                                                                                                      |                               |
|  | <b>4</b> | <b>What are the risks of using PCCs in bleeding patients?</b>                                                                                                                                                                                                                                                                                                                                                                                                                                                                                                                                                                                                                                                                                                                                                            |                               |
|  | <b>5</b> | <b>Is there comparative data on the transfusion of PCCs compared with FFP in bleeding patients?</b>                                                                                                                                                                                                                                                                                                                                                                                                                                                                                                                                                                                                                                                                                                                      |                               |
|  |          | ("Wounds and Injuries"[MeSH] OR "Craniocerebral Trauma"[MeSH] OR "Cerebrovascular Trauma"[MeSH] OR "Multiple Trauma"[MeSH] OR "Trauma, Nervous System"[MeSH] OR "Head Injuries, Penetrating"[MeSH] OR "Carotid Artery Injuries"[MeSH] OR "Head Injuries, Closed"[MeSH] OR "Spinal Cord Injuries"[MeSH] OR "Traumatology"[MeSH] OR "Brain Injuries"[MeSH]) AND ("Thromboplastin"[MeSH] OR "Partial Thromboplastin Time"[MeSH] OR "Factor XI"[MeSH] OR "thromboplastin apoprotein, human"[Substance Name] OR "prothrombinase complex"[Substance Name] OR "Factor IXa"[MeSH] OR "Prothrombin Time"[MeSH] OR "Factor VII"[MeSH] OR "Factor IX"[MeSH] OR "prothrombin complex concentrates"[Substance Name])                                                                                                                  | Humans<br>English<br>2012-end |
|  | <b>6</b> | <b>Does treatment with PCCs affect clinical outcome in patients who received pre-injury treatment with oral anticoagulants?</b>                                                                                                                                                                                                                                                                                                                                                                                                                                                                                                                                                                                                                                                                                          |                               |
|  |          | ("Wounds and Injuries"[MeSH] OR "Craniocerebral Trauma"[MeSH] OR "Cerebrovascular Trauma"[MeSH] OR "Multiple Trauma"[MeSH] OR "Trauma, Nervous System"[MeSH] OR "Head Injuries, Penetrating"[MeSH] OR "Carotid Artery Injuries"[MeSH] OR "Head Injuries, Closed"[MeSH] OR "Spinal Cord Injuries"[MeSH] OR "Traumatology"[MeSH] OR "Brain Injuries"[MeSH]) AND ("Thromboplastin"[MeSH] OR "Partial Thromboplastin Time"[MeSH] OR "Factor XI"[MeSH] OR "thromboplastin apoprotein, human"[Substance Name] OR "prothrombinase complex"[Substance Name] OR "Factor IXa"[MeSH] OR "Prothrombin Time"[MeSH] OR "Factor VII"[MeSH] OR "Factor IX"[MeSH] OR "prothrombin complex concentrates"[Substance Name]) AND "Anticoagulants"[Mesh]                                                                                       | Humans<br>English<br>10 years |
|  |          | <b><i>Desmopressin</i></b>                                                                                                                                                                                                                                                                                                                                                                                                                                                                                                                                                                                                                                                                                                                                                                                               |                               |
|  | <b>1</b> | <b>What are the indications for the use of desmopressin in a bleeding patient?</b>                                                                                                                                                                                                                                                                                                                                                                                                                                                                                                                                                                                                                                                                                                                                       |                               |

**The European guideline on management of major bleeding and coagulopathy following trauma:  
Fourth edition**

Rossaint R, Bouillon B, Cerny V, Coats TJ, Duranteau J, Fernández-Mondéjar E, Filipescu D, Hunt BJ, Komadina R, Nardi G, Neugebauer EAM, Ozier Y, Riddez L, Schultz A, Vincent J-L, Spahn DR

|  |          |                                                                                                                                                                                                                                                                                                                                                                                                                                                                                                                                                                                                                                                                     |                               |
|--|----------|---------------------------------------------------------------------------------------------------------------------------------------------------------------------------------------------------------------------------------------------------------------------------------------------------------------------------------------------------------------------------------------------------------------------------------------------------------------------------------------------------------------------------------------------------------------------------------------------------------------------------------------------------------------------|-------------------------------|
|  | <b>2</b> | <b>What is the recommended dose of desmopressin in a bleeding patient?</b>                                                                                                                                                                                                                                                                                                                                                                                                                                                                                                                                                                                          |                               |
|  | <b>3</b> | <b>Has desmopressin been shown to be efficacious?</b>                                                                                                                                                                                                                                                                                                                                                                                                                                                                                                                                                                                                               |                               |
|  | <b>4</b> | <b>What are the risks of using desmopressin in bleeding patients?</b>                                                                                                                                                                                                                                                                                                                                                                                                                                                                                                                                                                                               |                               |
|  |          | ("Emergencies"[MeSH] OR "Emergency Treatment"[MeSH] OR "Emergency Medicine"[MeSH] OR "Emergency Medical Technicians"[MeSH] OR "Wounds and Injuries"[MeSH] OR "Craniocerebral Trauma"[MeSH] OR "Cerebrovascular Trauma"[MeSH] OR "Multiple Trauma"[MeSH] OR "Trauma, Nervous System"[MeSH] OR "Head Injuries, Penetrating"[MeSH] OR "Carotid Artery Injuries"[MeSH] OR "Head Injuries, Closed"[MeSH] OR "Spinal Cord Injuries"[MeSH] OR "Traumatology"[MeSH] OR "Brain Injuries"[MeSH]) AND "Deamino Arginine Vasopressin"[Mesh]                                                                                                                                     | Humans<br>English<br>2012-end |
|  |          | <b>Calcium</b>                                                                                                                                                                                                                                                                                                                                                                                                                                                                                                                                                                                                                                                      |                               |
|  | <b>1</b> | <b>Under which circumstances should ionised calcium levels be monitored?</b>                                                                                                                                                                                                                                                                                                                                                                                                                                                                                                                                                                                        |                               |
|  |          | ("Emergencies"[MAJR] OR "Emergency Treatment"[ MAJR] OR "Emergency Medicine"[ MAJR] OR "Emergency Medical Technicians"[ MAJR] OR "Wounds and Injuries"[ MAJR] OR "Craniocerebral Trauma"[ MAJR] OR "Cerebrovascular Trauma"[ MAJR] OR "Multiple Trauma"[ MAJR] OR "Trauma, Nervous System"[ MAJR] OR "Head Injuries, Penetrating"[ MAJR] OR "Carotid Artery Injuries"[ MAJR] OR "Head Injuries, Closed"[ MAJR] OR "Spinal Cord Injuries"[ MAJR] OR "Traumatology"[ MAJR] OR "Brain Injuries"[ MAJR]) AND "Calcium"[MAJR]                                                                                                                                            | Humans<br>English<br>2012-end |
|  | <b>2</b> | <b>What is the appropriate use of calcium chloride in the bleeding trauma patient?</b>                                                                                                                                                                                                                                                                                                                                                                                                                                                                                                                                                                              |                               |
|  |          | ("Emergencies"[MAJR] OR "Emergency Treatment"[ MAJR] OR "Emergency Medicine"[ MAJR] OR "Emergency Medical Technicians"[ MAJR] OR "Wounds and Injuries"[ MAJR] OR "Craniocerebral Trauma"[ MAJR] OR "Cerebrovascular Trauma"[ MAJR] OR "Multiple Trauma"[ MAJR] OR "Trauma, Nervous System"[ MAJR] OR "Head Injuries, Penetrating"[ MAJR] OR "Carotid Artery Injuries"[ MAJR] OR "Head Injuries, Closed"[ MAJR] OR "Spinal Cord Injuries"[ MAJR] OR "Traumatology"[ MAJR] OR "Brain Injuries"[ MAJR]) AND "Calcium/therapeutic use"[MAJR]                                                                                                                            | Humans<br>English<br>2012-end |
|  |          | <b>Novel anticoagulants</b>                                                                                                                                                                                                                                                                                                                                                                                                                                                                                                                                                                                                                                         |                               |
|  | <b>1</b> | <b>Does pre-injury anticoagulant medication influence outcome?</b>                                                                                                                                                                                                                                                                                                                                                                                                                                                                                                                                                                                                  |                               |
|  |          | ("Emergencies"[MAJR] OR "Emergency Treatment"[ MAJR] OR "Emergency Medicine"[ MAJR] OR "Emergency Medical Technicians"[ MAJR] OR "Wounds and Injuries"[ MAJR] OR "Craniocerebral Trauma"[ MAJR] OR "Cerebrovascular Trauma"[ MAJR] OR "Multiple Trauma"[ MAJR] OR "Trauma, Nervous System"[ MAJR] OR "Head Injuries, Penetrating"[ MAJR] OR "Carotid Artery Injuries"[ MAJR] OR "Head Injuries, Closed"[ MAJR] OR "Spinal Cord Injuries"[ MAJR] OR "Traumatology"[ MAJR] OR "Brain Injuries"[ MAJR]) AND ("Outcome Assessment (Health Care)"[Mesh] OR "Treatment Outcome"[Mesh] OR "Outcome and Process Assessment (Health Care)"[Mesh]) AND "Anticoagulants"[Mesh] | Humans<br>English             |
|  | <b>2</b> | <b>How can drug-induced coagulation disorders be detected and diagnosed?</b>                                                                                                                                                                                                                                                                                                                                                                                                                                                                                                                                                                                        |                               |
|  |          | ("Emergencies"[MAJR] OR "Emergency Treatment"[ MAJR] OR "Emergency Medicine"[ MAJR] OR "Emergency Medical Technicians"[ MAJR] OR "Wounds and Injuries"[ MAJR] OR "Craniocerebral Trauma"[ MAJR] OR "Cerebrovascular Trauma"[ MAJR] OR "Multiple Trauma"[ MAJR] OR "Trauma, Nervous System"[ MAJR] OR "Head Injuries, Penetrating"[ MAJR] OR "Carotid Artery Injuries"[ MAJR] OR "Head Injuries, Closed"[ MAJR] OR "Spinal Cord Injuries"[ MAJR] OR "Traumatology"[ MAJR] OR "Brain Injuries"[ MAJR]) AND ("Diagnosis"[Mesh] OR "Early Diagnosis"[Mesh]) AND "Blood Coagulation Disorders"[Mesh] AND "Anticoagulants"[Mesh]                                          | Humans<br>English             |
|  | <b>3</b> | <b>How should drug-induced coagulopathies be managed?</b>                                                                                                                                                                                                                                                                                                                                                                                                                                                                                                                                                                                                           |                               |
|  | <b>4</b> | <b>Which antidotes can reverse the effects of pre-injury treatment with oral anticoagulants such as rivaroxaban, apixaban, endoxaban or dabigatran?</b>                                                                                                                                                                                                                                                                                                                                                                                                                                                                                                             |                               |

**The European guideline on management of major bleeding and coagulopathy following trauma:  
Fourth edition**

Rossaint R, Bouillon B, Cerny V, Coats TJ, Duranteau J, Fernández-Mondéjar E, Filipescu D, Hunt BJ, Komadina R, Nardi G, Neugebauer EAM, Ozier Y, Riddez L, Schultz A, Vincent J-L, Spahn DR

|                                                                |                                                                                                                                                                                                                                                                                                                                                                                                                                                                                                                                                                                                                                                                                                                                                         |                               |
|----------------------------------------------------------------|---------------------------------------------------------------------------------------------------------------------------------------------------------------------------------------------------------------------------------------------------------------------------------------------------------------------------------------------------------------------------------------------------------------------------------------------------------------------------------------------------------------------------------------------------------------------------------------------------------------------------------------------------------------------------------------------------------------------------------------------------------|-------------------------------|
|                                                                | ("Emergencies"[MeSH] OR "Emergency Treatment"[MeSH] OR "Emergency Medicine"[MeSH] OR "Emergency Medical Technicians"[MeSH] OR "Wounds and Injuries"[MeSH] OR "Craniocerebral Trauma"[MeSH] OR "Cerebrovascular Trauma"[MeSH] OR "Multiple Trauma"[MeSH] OR "Trauma, Nervous System"[MeSH] OR "Head Injuries, Penetrating"[MeSH] OR "Carotid Artery Injuries"[MeSH] OR "Head Injuries, Closed"[MeSH] OR "Spinal Cord Injuries"[MeSH] OR "Traumatology"[MeSH] OR "Brain Injuries"[MeSH]) AND ("Anticoagulants"[Mesh] OR "rivaroxaban"[Supplementary Concept] OR "apixaban"[All Fields] OR "dabigatran"[Supplementary Concept] OR endoxaban[All Fields]) AND ("Therapeutics"[Mesh] OR "Emergency Treatment"[Mesh] OR "Antidotes" [Pharmacological Action]) | Humans<br>English<br>2012-end |
| <b>VII</b> <b>GUIDELINE IMPLEMENTATION AND QUALITY CONTROL</b> |                                                                                                                                                                                                                                                                                                                                                                                                                                                                                                                                                                                                                                                                                                                                                         |                               |
| <b>1</b>                                                       | <b>Which massive transfusion guidelines have been published?</b>                                                                                                                                                                                                                                                                                                                                                                                                                                                                                                                                                                                                                                                                                        |                               |
| <b>2</b>                                                       | <b>Which massive transfusion guidelines are used in clinical practice: institutional, national, international?</b>                                                                                                                                                                                                                                                                                                                                                                                                                                                                                                                                                                                                                                      |                               |
| <b>3</b>                                                       | <b>How uniform are massive transfusion guidelines?</b>                                                                                                                                                                                                                                                                                                                                                                                                                                                                                                                                                                                                                                                                                                  |                               |
| <b>4</b>                                                       | <b>Are massive transfusion guidelines adhered to in clinical practice?</b>                                                                                                                                                                                                                                                                                                                                                                                                                                                                                                                                                                                                                                                                              |                               |
|                                                                | ("Wounds and Injuries"[MeSH] OR "Craniocerebral Trauma"[MeSH] OR "Cerebrovascular Trauma"[MeSH] OR "Multiple Trauma"[MeSH] OR "Trauma, Nervous System"[MeSH] OR "Head Injuries, Penetrating"[MeSH] OR "Carotid Artery Injuries"[MeSH] OR "Head Injuries, Closed"[MeSH] OR "Spinal Cord Injuries"[MeSH] OR "Traumatology"[MeSH] OR "Brain Injuries"[MeSH]) AND ("Blood Transfusion"[Mesh] OR "Transfusion Medicine"[Mesh] OR "Platelet Transfusion"[Mesh] OR "Erythrocyte Transfusion"[Mesh] OR "Blood Component Transfusion"[Mesh]) AND ("Guideline" [Publication Type] OR "Evidence-Based Emergency Medicine"[Mesh] OR "Evidence-Based Practice"[Mesh] OR "Guideline Adherence"[Mesh] OR "Evidence-Based Medicine"[Mesh])                              | Humans<br>English<br>10 years |
| <b>5</b>                                                       | <b>Has clinical practice in the management of polytrauma patients changed?</b>                                                                                                                                                                                                                                                                                                                                                                                                                                                                                                                                                                                                                                                                          |                               |
|                                                                | ("Emergencies"[MeSH] OR "Emergency Treatment"[MeSH] OR "Emergency Medicine"[MeSH] OR "Emergency Medical Technicians"[MeSH] OR "Wounds and Injuries"[MeSH] OR "Craniocerebral Trauma"[MeSH] OR "Cerebrovascular Trauma"[MeSH] OR "Multiple Trauma"[MeSH] OR "Trauma, Nervous System"[MeSH] OR "Head Injuries, Penetrating"[MeSH] OR "Carotid Artery Injuries"[MeSH] OR "Head Injuries, Closed"[MeSH] OR "Spinal Cord Injuries"[MeSH] OR "Traumatology"[MeSH] OR "Brain Injuries"[MeSH]) AND "Physician's Practice Patterns"[Mesh]                                                                                                                                                                                                                        | Humans<br>English<br>2012-end |
| <b>6</b>                                                       | <b>Does the implementation and use of multi-disciplinary trauma treatment simulation improve outcomes?</b>                                                                                                                                                                                                                                                                                                                                                                                                                                                                                                                                                                                                                                              |                               |
| <b>7</b>                                                       | <b>Which types of educational measure are effective in improving outcomes in trauma patients?</b>                                                                                                                                                                                                                                                                                                                                                                                                                                                                                                                                                                                                                                                       |                               |
|                                                                | ("Multiple Trauma"[MeSH] OR "Traumatology"[MeSH]) AND ("Education"[Mesh] OR "Patient Simulation"[Mesh])                                                                                                                                                                                                                                                                                                                                                                                                                                                                                                                                                                                                                                                 | Humans<br>English<br>10 years |
| <b>8</b>                                                       | <b>Does the implementation and use of treatment 'bundles' improve outcomes?</b>                                                                                                                                                                                                                                                                                                                                                                                                                                                                                                                                                                                                                                                                         |                               |
|                                                                | ("Emergencies"[MeSH] OR "Emergency Treatment"[MeSH] OR "Emergency Medicine"[MeSH] OR "Emergency Medical Technicians"[MeSH] OR "Wounds and Injuries"[MeSH] OR "Craniocerebral Trauma"[MeSH] OR "Cerebrovascular Trauma"[MeSH] OR "Multiple Trauma"[MeSH] OR "Trauma, Nervous System"[MeSH] OR "Head Injuries, Penetrating"[MeSH] OR "Carotid Artery Injuries"[MeSH] OR "Head Injuries, Closed"[MeSH] OR "Spinal Cord Injuries"[MeSH] OR "Traumatology"[MeSH] OR "Brain Injuries"[MeSH]) AND "Patient Care Bundles"[Mesh]                                                                                                                                                                                                                                 | Humans<br>English<br>10 years |

1

2
